# Supplementary material for: Millipedes and centipedes in German greenhouses (Myriapoda: Diplopoda, Chilopoda)
Source: Biodivers Data J. 2014 Apr 11;(2):e1066. doi: 10.3897/BDJ.2.e1066 (PMC4031429; doi:10.3897/BDJ.2.e1066)
Supplement: Supplementary material 1 — Occurrence data of Diplopoda and Chilopoda from German greenhouses [file biodiversity_data_journal-2-e1066-s001.xls]

## Sheet: Diplopoda
Species	Federal State	City	Location	Site	Latitude (decimal)	Longitude (decimal)	Coordinate uncertainty in meters	Geodetic datum	Micro-habitat	Sampling date	Collector	Sampled specimens	Collection	Notes	Literature
Amphitomeus attemsi (Schubart, 1934)	Berlin	Berlin	Botanischer Garten Dahlem der Freien Universität Berlin [Botanical Garden Berlin-Dahlem]	Gewächshaus A (Großes Tropenhaus / Tropischer Regenwald) [Great tropical hothouse / Tropical Rainforest]	52.4548	13.3085	100	WGS 84	in mulch	2013-05-15	E. N. Lindner	2	SMNG
Amphitomeus attemsi (Schubart, 1934)	Berlin	Berlin	Botanischer Garten Dahlem der Freien Universität Berlin [Botanical Garden Berlin-Dahlem]	Gewächshaus D (Orchideen und Kannenpflanzen) [Tropical hothouse Orchids and Nepenthes]	52.4548	13.3085	100	WGS 84	under stones	2013-05-15	E. N. Lindner	3	SMNG
Amphitomeus attemsi (Schubart, 1934)	Berlin	Berlin	Botanischer Garten Dahlem der Freien Universität Berlin [Botanical Garden Berlin-Dahlem]	Gewächshaus D (Orchideen und Kannenpflanzen) [Tropical hothouse Orchids and Nepenthes]	52.4548	13.3085	100	WGS 84	at dead wood	2013-05-15	E. N. Lindner	1	SMNG
Amphitomeus attemsi (Schubart, 1934)	Berlin	Berlin	Botanischer Garten Dahlem der Freien Universität Berlin [Botanical Garden Berlin-Dahlem]	Gewächshaus F (Tropische und subtropische Farne) [Tropical hothouse Ferns]	52.4548	13.3085	100	WGS 84	under stones	2013-05-15	E. N. Lindner	4	SMNG
Amphitomeus attemsi (Schubart, 1934)	Berlin	Berlin	Botanischer Garten Dahlem der Freien Universität Berlin [Botanical Garden Berlin-Dahlem]	Gewächshaus G (Bromeliengewächse) [Tropical hothouse Bromelias]	52.4548	13.3085	100	WGS 84	under leaves	2013-05-15	E. N. Lindner	2	SMNG
Amphitomeus attemsi (Schubart, 1934)	Berlin	Berlin	Botanischer Garten Dahlem der Freien Universität Berlin [Botanical Garden Berlin-Dahlem]	Palmhaus [palm house]	52.4548	13.3085	100	WGS 84					ZMB		SCHUBART (1934)
Amphitomeus attemsi (Schubart, 1934)	Berlin	Berlin	Botanischer Garten Dahlem der Freien Universität Berlin [Botanical Garden Berlin-Dahlem]	Palmhaus [palm house]	52.4548	13.3085	100	WGS 84			Eichler				EICHLER (1952)
Amphitomeus attemsi (Schubart, 1934)	Berlin	Berlin	Botanischer Garten Dahlem der Freien Universität Berlin [Botanical Garden Berlin-Dahlem]	tropical hothouses	52.4548	13.3085	100	WGS 84	on dead wood, under bark	2005-04-29	H. Reip	5	SMNG
Amphitomeus attemsi (Schubart, 1934)	Northrhine-Westphalia	Bochum	Botanischer Garten der Ruhr-Universität Bochum [Botanical Garden Bochum]	tropical hothouses	51.4894	11.9591	100	WGS 84	under a big piece of wood	2003		4
Amphitomeus attemsi (Schubart, 1934)	Northrhine-Westphalia	Bonn	Botanischer Garten der Friedrichs-Wilhelms-Universität Bonn [Botanical Garden Bonn]	Palmhaus [palm house]	50.7243	7.0913	100	WGS 84	under leaf litter	2007-08-14	P. Decker & N. Laufer	1♀	SMNG		DECKER & HANNIG (2011)
Amphitomeus attemsi (Schubart, 1934)	Hesse	Frankfurt am Main	Palmengarten [Palm Garden]	Mangrove	50.1233	8.6559	100	WGS 84		03.07.2008-17.07.2008	E. Heußler	2	SMNG	pitfall traps, temperature 20-23 °C, humidity ca. 90%
Amphitomeus attemsi (Schubart, 1934)	Saxony-Anhalt	Halle (Saale)	Botanischer Garten der Martin-Luther-Universität Halle-Wittenberg [Botanical Garden Halle]	tropical hothouse	51.4894	11.9591	100	WGS 84	under pieces of dead wood	2011-05-09	H. Reip	15♀♀	SMNG
Amphitomeus attemsi (Schubart, 1934)	Hamburg	Hamburg	Loki-Schmidt-Garten [Loki-Schmidt Botanical Garden Hamburg]	tropical hothouses	53.5603	9.9858	100	WGS 84	under wood and dead leaves	2007-11-10	H. Reip	11	SMNG
Amphitomeus attemsi (Schubart, 1934)	Thuringia	Jena	Botanischer Garten der Friedrich-Schiller-Universität Jena [Botanical Garden Jena]		50.9308	11.5858	100	WGS 84	under stones	2004-03-15	H. Reip	2	SMNG
Amphitomeus attemsi (Schubart, 1934)	Thuringia	Jena	Botanischer Garten der Friedrich-Schiller-Universität Jena [Botanical Garden Jena]		50.9308	11.5858	100	WGS 84	under stones and in gravel soil	2008-04-11	H. Reip	4	SMNG
Amphitomeus attemsi (Schubart, 1934)	Baden-Württemberg	Karlsruhe	Botanischer Garten Karlsruhe [Botanical Garden Karlsruhe]	greenhouses, easten big hothouse	49.0136	8.4011	100	WGS 84	under flower pots and pices of dead wood	2010-04-13	H. Reip	11	SMNG
Amphitomeus attemsi (Schubart, 1934)	Schleswig-Holstein	Kiel	Botanischer Garten der Christian-Albrechts-Universität zu Kiel [Botanical Garden Kiel]	Viktoria-Haus [Victoria house]	54.347	10.1158	100	WGS 84		07.11.1998–11.09.1999	Wilck, Adis & Golovatch			temperature 18-24°C, humidity 68-90%	WILCK (2000)
Amphitomeus attemsi (Schubart, 1934)	Northrhine-Westphalia	Köln [Cologne]	Flora [Botanical Garden Cologne]		50.9607	6.9692	100	WGS 84	leaf litter	2007-08-14	P. Decker & N. Laufer	4♀♀	SMNG		DECKER & HANNIG (2011)
Amphitomeus attemsi (Schubart, 1934)	Northrhine-Westphalia	Köln [Cologne]	Flora [Botanical Garden Cologne]		50.9607	6.9692	100	WGS 84	under dead wood and stones	2010-06-30	H. Reip	10	SMNG
Amphitomeus attemsi (Schubart, 1934)	Saxony	Leipzig	Botanischer Garten Leipzig [Botanical Garden Leipzig]	Gewächshäuser [Tropical hothouses]	51.3283	12.3912	100	WGS 84		1995-12-31	E. N. Lindner	14	SMNG
Amphitomeus attemsi (Schubart, 1934)	Saxony	Leipzig	Botanischer Garten Leipzig [Botanical Garden Leipzig]	Gewächshäuser, Haus 1 (Tropenhaus/Schmetterlingshaus) [Tropical hothouses, House 1, Butterfly house]	51.3283	12.3912	100	WGS 84	at dead wood	2013-04-03	E. N. Lindner	9	SMNG
Amphitomeus attemsi (Schubart, 1934)	Saxony-Anhalt	Magdeburg	Gruson-Gewächshäuser [Gruson greenhouses]	Bromelienhaus [bromeliad house	52.1139	11.6315	100	WGS 84	under pieces of bark on bark mulch	2012-06-13	H. Reip	5	SMNG
Amphitomeus attemsi (Schubart, 1934)	Saxony-Anhalt	Magdeburg	Gruson-Gewächshäuser [Gruson greenhouses]	Großes Tropenhaus [big tropical house]	52.1139	11.6315	100	WGS 84	under pieces of wood on ground, under bark	2012-06-13	H. Reip	22	SMNG
Amphitomeus attemsi (Schubart, 1934)	Saxony-Anhalt	Magdeburg	Gruson-Gewächshäuser [Gruson greenhouses]	Kleines Tropenhaus with Victoriahaus [small tropical house with Victoria house]	52.1139	11.6315	100	WGS 84	under stones	2012-06-13	H. Reip	2	SMNG
Amphitomeus attemsi (Schubart, 1934)	Rhineland-Palatinate	Mainz	Botanischer Garten der Johannes Gutenberg Universität Mainz [Botanical Garden Mainz]	tropical hothouses	49.9925	8.2454	100	WGS 84	leaf litter	2006-11-04	P. Decker	8♀♀	SMNG
Amphitomeus attemsi (Schubart, 1934)	Bavaria	München [Munich]	Botanischer Garten München-Nymphenburg [Botanical Garden München-Nymphenburg]	greenhouse and Geweihfarnpavillon [elkhorn ferns pavilion]	48.1606	11.5021	100	WGS 84	in moist dead wood, under bark and upper soil	2009-05-28	H. Reip	6	SMNG
Amphitomeus attemsi (Schubart, 1934)	Brandenburg	Potsdam	Botanischer Garten Potsdam [Botanical Garden Potsdam]	Bromelarium [bromeliad house]	52.404	13.025	100	WGS 84	under and in dead wood and under dead leaves	2009-11-07	H. Reip	25	SMNG	temperature 14-23°C
Amphitomeus attemsi (Schubart, 1934)	Brandenburg	Potsdam	Botanischer Garten Potsdam [Botanical Garden Potsdam]	Victoriahaus (Haus 7) [Victoria house (house 7)]	52.404	13.025	100	WGS 84	under and in dead wood and under dead leaves	2009-11-07	H. Reip	8	SMNG	temperature 20-28°C
Amphitomeus attemsi (Schubart, 1934)	Brandenburg	Potsdam	Biosphäre Potsdam (im BUGA-Park) [Biosphere Potsdam]	Tropenhaus [tropical hothouse]	52.4185	13.0486	100	WGS 84	at dead wood	2013-09-19	E. N. Lindner	5	SMNG
Anadenobolus monilicornis (Porat, 1876)	Saxony	Leipzig	Zoologischer Garten Leipzig, Gondwanaland [Zoological Garden Leipzig, Gondwanaland]	Tropical Hothouse	51.3505	12.3716	100	WGS 84	at dead wood	2013-04-05	E. N. Lindner	1♂	SMNG
Anadenobolus monilicornis (Porat, 1876)	Saxony	Leipzig	Zoologischer Garten Leipzig, Gondwanaland [Zoological Garden Leipzig, Gondwanaland]	Tropical Hothouse	51.3505	12.3716	100	WGS 84	at dead wood	2013-03-26	E. N. Lindner	3♀♀	SMNG
Anadenobolus monilicornis (Porat, 1876)	Saxony	Leipzig	Zoologischer Garten Leipzig, Gondwanaland [Zoological Garden Leipzig, Gondwanaland]	Tropical Hothouse	51.3505	12.3716	100	WGS 84	under leaves	2013-04-05	E. N. Lindner	1♀	SMNG
Anadenobolus monilicornis (Porat, 1876)	Saxony	Leipzig	Zoologischer Garten Leipzig, Gondwanaland [Zoological Garden Leipzig, Gondwanaland]	Tropical Hothouse	51.3505	12.3716	100	WGS 84	at trunc of palm tree	2013-07-28	E. N. Lindner	1♀	SMNG
Archiboreoiulus pallidus (Brade-Birks, 1920)	Northrhine-Westphalia	Köln [Cologne]	Flora [Botanical Garden Cologne]	Subtropisches Gewächshaus [subtropical greenhouse]	50.9607	6.9692	100	WGS 84	under dead wood and stones	2010-06-30	H. Reip	2♀♀, 6 juv.	SMNG
Blaniulus guttulatus (Bosc, 1792)	Berlin	Berlin	Botanischer Garten Dahlem der Freien Universität Berlin [Botanical Garden Berlin-Dahlem]	Blattvermehrungsanbau (Tropenpflanzenanbau) (des Palmenhauses) [propagation nursery of tropical plants of the Palm House]	52.4548	13.3085	100	WGS 84			Eichler				EICHLER (1952)
Blaniulus guttulatus (Bosc, 1792)	Berlin	Berlin	Botanischer Garten Dahlem der Freien Universität Berlin [Botanical Garden Berlin-Dahlem]	Gewächshaus K (Südafrika) [Tropical hothouse Southafrica]	52.4548	13.3085	100	WGS 84	under stones on sandy ground	2013-05-15	E. N. Lindner	4♀♀, 1 juv.	SMNG
Blaniulus guttulatus (Bosc, 1792)	Saxony	Dresden	Botanischer Garten der Technischen Universität Dresden [Botanical Garden Dresden]	Großes Tropenhaus [big tropical hothouse	51.0435	13.7582	100	WGS 84	on soil in flower pot	2012-01-07	P. Decker & S. Worch	1♀	SMNG
Blaniulus guttulatus (Bosc, 1792)	Saxony	Dresden	Botanischer Garten Dresden [Botanical Garden Dresden]	Warmhaus [hothouse]	51.0435	13.7582	100	WGS 84	at dead wood	2013-03-10	E. N. Lindner	4♀♀	SMNG
Blaniulus guttulatus (Bosc, 1792)	Hesse	Frankfurt am Main	Palmengarten [Palm Garden]	Palmenhaus [palm house]	50.1233	8.6559	100	WGS 84		14.08.2008-28.08.2008	E. Heußler	51	SMNG	pitfall traps, temperature 13-24 °C, humidity ca. 60%
Blaniulus guttulatus (Bosc, 1792)	Hesse	Frankfurt am Main	Palmengarten [Palm Garden]	Regenwald [rain forest]	50.1233	8.6559	100	WGS 84		14.03.2008-28.03.2008	E. Heußler	80	SMNG	pitfall traps, temperature 20-22 °C, humidity ca. 70-80%
Blaniulus guttulatus (Bosc, 1792)	Thuringia	Jena	Botanischer Garten der Friedrich-Schiller-Universität Jena [Botanical Garden Jena]	cool greenhouse	50.9308	11.5858	100	WGS 84	under flower pots	2008-04-11	H. Reip	2♂♂, 2 juv.	SMNG
Blaniulus guttulatus (Bosc, 1792)	Thuringia	Jena	Botanischer Garten der Friedrich-Schiller-Universität Jena [Botanical Garden Jena]	tropical hothouse	50.9308	11.5858	100	WGS 84	under stones	2004-03-15	H. Reip	1	SMNG
Blaniulus guttulatus (Bosc, 1792)	Northrhine-Westphalia	Köln [Cologne]	Zoological Institut at Weyertal	old greenhouse	50.927	6.9223	700	WGS 84					material lost		THIELE (1968)
Blaniulus guttulatus (Bosc, 1792)	Brandenburg	Potsdam	Botanischer Garten Potsdam [Botanical Garden Potsdam]	Palmenhaus (Haus 1) [palm house (house 1)]	52.404	13.025	100	WGS 84	in bark mulch	2009-11-07	H. Reip	1♀, 1 juv.	SMNG	temperature 15-22°C
Blaniulus guttulatus (Bosc, 1792)	Mecklenburg-West Pomerania	Rostock	Botanischer Garten Rostock [Botanical Garden Rostock]	Palmenhaus [palm house]	54.0915	12.0949	100	WGS 84		1926-03-04		1♀	ZMB		SCHUBART (1929b)
Boreoiulus tenuis (Bigler, 1913)	Thuringia	Jena	Botanischer Garten der Friedrich-Schiller-Universität Jena [Botanical Garden Jena]	cool greenhouse	50.9308	11.5858	100	WGS 84	under flower pots	2008-04-11	H. Reip	1♂	SMNG
Brachydesmus superus Latzel, 1884	Berlin	Berlin	Botanischer Garten Dahlem der Freien Universität Berlin [Botanical Garden Berlin-Dahlem]	tropical hothouses	52.4548	13.3085	100	WGS 84		2004-03-19	H. Reip	1♂	SMNG
Brachydesmus superus Latzel, 1884	Berlin	Berlin	Botanischer Garten Dahlem der Freien Universität Berlin [Botanical Garden Berlin-Dahlem]	tropical hothouses	52.4548	13.3085	100	WGS 84					ZMB?		SCHUBART (1929a)
Brachydesmus superus Latzel, 1884	Berlin	Berlin	Botanischer Garten Dahlem der Freien Universität Berlin [Botanical Garden Berlin-Dahlem]	tropical hothouses	52.4548	13.3085	100	WGS 84			Eichler				EICHLER (1952)
Brachyiulus pusillus (Bosc, 1792)	Hesse	Frankfurt am Main	Palmengarten [Palm Garden]	Anzuchtshaus [propagator house]	50.1233	8.6559	100	WGS 84		28.03.2008-11.04.2008	E. Heußler	1	SMNG	pitfall traps, temperature ca. 25°C, humidity ca. 80%
Choneiulus palmatus (Němec, 1895)	Berlin	Berlin	Botanischer Garten Dahlem der Freien Universität Berlin [Botanical Garden Berlin-Dahlem]	Gewächshaus B (Begonien) [Tropical hothouse Begonias]	52.4548	13.3085	100	WGS 84	at dead wood	2013-05-15	E. N. Lindner	3♂♂, 1♀, 2 juv.	SMNG
Choneiulus palmatus (Němec, 1895)	Berlin	Berlin	Botanischer Garten Dahlem der Freien Universität Berlin [Botanical Garden Berlin-Dahlem]	Gewächshaus L (Tierfangende Pflanzen und Pflanzen der Südhemisphäre) [Tropical hothouse Carnivorous plants]	52.4548	13.3085	100	WGS 84	under stone	2013-05-15	E. N. Lindner	1 juv.	SMNG
Choneiulus palmatus (Němec, 1895)	Berlin	Berlin	Botanischer Garten Dahlem der Freien Universität Berlin [Botanical Garden Berlin-Dahlem]	Gewächshaus M (Australien und Neuseeland) [Tropical hothouse Australia and New Zealand]	52.4548	13.3085	100	WGS 84	at dead wood	2013-05-15	E. N. Lindner	1♂, 1♀	SMNG
Choneiulus palmatus (Němec, 1895)	Berlin	Berlin	Botanischer Garten Dahlem der Freien Universität Berlin [Botanical Garden Berlin-Dahlem]	tropical hothouses	52.4548	13.3085	100	WGS 84		2004-03-19	H. Reip	2	SMNG
Choneiulus palmatus (Němec, 1895)	Berlin	Berlin	Botanischer Garten Dahlem der Freien Universität Berlin [Botanical Garden Berlin-Dahlem]	tropical hothouses	52.4548	13.3085	100	WGS 84	in and under dead wood and bark	2005-04-29	H. Reip	10	SMNG
Choneiulus palmatus (Němec, 1895)	Berlin	Berlin	Botanischer Garten Dahlem der Freien Universität Berlin [Botanical Garden Berlin-Dahlem]	tropical hothouses	52.4548	13.3085	100	WGS 84					ZMB		SCHUBART (1929a)
Choneiulus palmatus (Němec, 1895)	Berlin	Berlin	Botanischer Garten Dahlem der Freien Universität Berlin [Botanical Garden Berlin-Dahlem]	tropical hothouses	52.4548	13.3085	100	WGS 84			Eichler				EICHLER (1952)
Choneiulus palmatus (Němec, 1895)	Northrhine-Westphalia	Bochum	Botanischer Garten der Ruhr-Universität Bochum [Botanical Garden Bochum]	tropical hothouses	51.4894	11.9591	100	WGS 84		11.2005	C. Schmidt
Choneiulus palmatus (Němec, 1895)	Saxony	Dresden	Botanischer Garten der Technischen Universität Dresden [Botanical Garden Dresden]	Victora-Haus, Überwinterungshaus der subtropischer und mediterraner Gehölze [Victoria house, hibernation house for subtropical and Mediterranean wood]	51.0435	13.7582	100	WGS 84	under dead leaf in flower pot	2012-01-07	P. Decker & S. Worch	1♀	SMNG
Choneiulus palmatus (Němec, 1895)	Saxony	Dresden	Botanischer Garten der Technischen Universität Dresden [Botanical Garden Dresden]	Warmhäuser [hothouses]	51.0435	13.7582	100	WGS 84		1964-11-17					RICHTER (1967)
Choneiulus palmatus (Němec, 1895)	Hesse	Frankfurt am Main	Palmengarten [Palm Garden]	Bromelarium [bromeliad house]	50.1233	8.6559	100	WGS 84		14.03.2008-28.03.2008	E. Heußler	3	SMNG	pitfall traps, temperature 20-23 °C, humidity ca. 60%
Choneiulus palmatus (Němec, 1895)	Hesse	Frankfurt am Main	Palmengarten [Palm Garden]	Monsun	50.1233	8.6559	100	WGS 84		2011-11-28	H. Reip	1♀	SMNG
Choneiulus palmatus (Němec, 1895)	Hesse	Frankfurt am Main	Palmengarten [Palm Garden]	Regenwald [rain forest]	50.1233	8.6559	100	WGS 84		14.03.2008-28.03.2008	E. Heußler	4	SMNG	pitfall traps, temperature 20-22 °C, humidity ca. 70-80%
Choneiulus palmatus (Němec, 1895)	Hesse	Frankfurt am Main	Palmengarten [Palm Garden]	Savanne [savanna]	50.1233	8.6559	100	WGS 84		14.03.2008-25.04.2008, 03.07.2008-17.07.2008	E. Heußler	12	SMNG	pitfall traps, temperature 17-26 °C, humidity ca.70 %
Choneiulus palmatus (Němec, 1895)	Hamburg	Hamburg	Loki-Schmidt-Garten [Loki-Schmidt Botanical Garden Hamburg]	tropical hothouses	53.5603	9.9858	100	WGS 84	under wood and dead leaves	2007-11-10	H. Reip	14♂♂, 26♀♀	SMNG
Choneiulus palmatus (Němec, 1895)	Thuringia	Jena	Botanischer Garten der Friedrich-Schiller-Universität Jena [Botanical Garden Jena]	cool greenhouse	50.9308	11.5858	100	WGS 84	under flower pots	2004-03-19	H. Reip	2♂♂, 5 ind.	SMNG
Choneiulus palmatus (Němec, 1895)	Thuringia	Jena	Botanischer Garten der Friedrich-Schiller-Universität Jena [Botanical Garden Jena]	hothouse	50.9308	11.5858	100	WGS 84	under stones and in gravel soil	2004-03-19	H. Reip	9	SMNG
Choneiulus palmatus (Němec, 1895)	Thuringia	Jena	Botanischer Garten der Friedrich-Schiller-Universität Jena [Botanical Garden Jena]	tropical hothouse	50.9308	11.5858	100	WGS 84	under stones	2004-03-15	H. Reip	7	SMNG
Choneiulus palmatus (Němec, 1895)	Baden-Württemberg	Karlsruhe	Botanischer Garten Karlsruhe [Botanical Garden Karlsruhe]	greenhouses, eastern big hothouse	49.0136	8.4011	100	WGS 84	under flower pots and dead wood	2010-04-13	H. Reip	4♂♂, 3♀♀, 1 juv.	SMNG
Choneiulus palmatus (Němec, 1895)	Northrhine-Westphalia	Köln [Cologne]	Zoological Institut at Weyertal	old greenhouse	50.927	6.9223	700	WGS 84					material lost		THIELE (1968)
Choneiulus palmatus (Němec, 1895)	Northrhine-Westphalia	Köln [Cologne]	Flora [Botanical Garden Cologne]	tropical Hothouse	50.9607	6.9692	100	WGS 84	under dead wood and stones	2010-06-30	H. Reip	1♂, 1♀	SMNG
Choneiulus palmatus (Němec, 1895)	Saxony	Leipzig	Botanischer Garten Leipzig [Botanical Garden Leipzig]	Gewächshäuser, Haus 2 [Tropical hothouses, House 2]	51.3283	12.3912	100	WGS 84	at dead wood	1995-12-12	E. N. Lindner	1♀, 1 juv.	SMNG
Choneiulus palmatus (Němec, 1895)	Saxony-Anhalt	Magdeburg	Gruson-Gewächshäuser [Gruson greenhouses]	Anzuchtshaus [propagator house]	52.1139	11.6315	100	WGS 84	under flower pots, on wood grate	2012-06-13	H. Reip	5♂♂, 6♀♀, 8 juv.	SMNG
Choneiulus palmatus (Němec, 1895)	Saxony-Anhalt	Magdeburg	Gruson-Gewächshäuser [Gruson greenhouses]	Großes Tropenhaus [big tropical house]	52.1139	11.6315	100	WGS 84	under pieces of wood on ground, under bark	2012-06-13	H. Reip	4♂♂, 2♀♀, 1 juv.	SMNG
Choneiulus palmatus (Němec, 1895)	Saxony-Anhalt	Magdeburg	Gruson-Gewächshäuser [Gruson greenhouses]	Orchideenhaus [orchid house]	52.1139	11.6315	100	WGS 84	under bag of peat on mix of peat and bark mulch	2012-06-13	H. Reip	1♂, 1♀ 3 juv.	SMNG
Choneiulus palmatus (Němec, 1895)	Saxony-Anhalt	Magdeburg	Gruson-Gewächshäuser [Gruson greenhouses]	Palmenhaus [palm house]	52.1139	11.6315	100	WGS 84	under palm bark on the ground	2012-06-13	H. Reip	1♂, 1♀	SMNG
Choneiulus palmatus (Němec, 1895)	Rhineland-Palatinate	Mainz	Botanischer Garten der Johannes Gutenberg Universität Mainz [Botanical Garden Mainz]	tropical hothouses	49.9925	8.2454	100	WGS 84	on dead wood	2006-11-04	P. Decker	1♀	SMNG
Choneiulus palmatus (Němec, 1895)	Brandenburg	Potsdam	Botanischer Garten Potsdam [Botanical Garden Potsdam]	Kakteen- und Sukulentenhaus (Haus 5) [cactus and succulent house (house 5)]	52.404	13.025	100	WGS 84	under stones	2009-11-07	H. Reip	17	SMNG	temperature 12-20°C
Choneiulus palmatus (Němec, 1895)	Brandenburg	Potsdam	Botanischer Garten Potsdam [Botanical Garden Potsdam]	Victoriahaus (Haus 7) [Victoria house (house 7)]	52.404	13.025	100	WGS 84	under and in dead wood and under dead leaves	2009-11-07	H. Reip	5♂♂, 2♀♀, 1 juv.	SMNG	temperature 20-28°C
Choneiulus palmatus (Němec, 1895)	Mecklenburg-West Pomerania	Rostock	Botanischer Garten Rostock [Botanical Garden Rostock]	hothouse	54.0915	12.0949	100	WGS 84		1926-03-04		1♀			SCHUBART (1929b)
Cylindrodesmus hirsutus Pocock, 1889	Berlin	Berlin	Zoologischer Garten Berlin [Berlin Zoological Garden]	Vogelhaus [aviary], Freiflughalle Australien [free flight hall Australia]	52.5102	13.3366	100	WGS 84	under stones	2013-09-28	P. Decker & M. Köhler	2♀♀	SMNG	individual already dead
Cylindrodesmus hirsutus Pocock, 1889	Berlin	Berlin	Botanischer Garten Dahlem der Freien Universität Berlin [Botanical Garden Berlin-Dahlem]	Gewächshaus A (Großes Tropenhaus / Tropischer Regenwald) [Great tropical hothouse / Tropical Rainforest]	52.4548	13.3085	100	WGS 84	at basis of Pritchcardia affinis	2013-05-15	E. N. Lindner	2♀♀, 1 juv.	SMNG
Cylindrodesmus hirsutus Pocock, 1889	Berlin	Berlin	Botanischer Garten Dahlem der Freien Universität Berlin [Botanical Garden Berlin-Dahlem]	Gewächshaus A (Großes Tropenhaus / Tropischer Regenwald) [Great tropical hothouse / Tropical Rainforest]	52.4548	13.3085	100	WGS 84	in humus	2013-05-15	E. N. Lindner	5♀♀, 2 juv.	SMNG
Cylindrodesmus hirsutus Pocock, 1889	Berlin	Berlin	Botanischer Garten Dahlem der Freien Universität Berlin [Botanical Garden Berlin-Dahlem]	Gewächshaus A (Großes Tropenhaus / Tropischer Regenwald) [Great tropical hothouse / Tropical Rainforest]	52.4548	13.3085	100	WGS 84	at Strelitzia nicolai	2013-05-15	E. N. Lindner	2♀♀	SMNG
Cylindrodesmus hirsutus Pocock, 1889	Berlin	Berlin	Botanischer Garten Dahlem der Freien Universität Berlin [Botanical Garden Berlin-Dahlem]	Gewächshaus B (Begonien) [Tropical hothouse Begonias]	52.4548	13.3085	100	WGS 84	at dead wood	2013-05-15	E. N. Lindner	2♀♀	SMNG
Cylindrodesmus hirsutus Pocock, 1889	Berlin	Berlin	Botanischer Garten Dahlem der Freien Universität Berlin [Botanical Garden Berlin-Dahlem]	Gewächshaus F (Tropische und subtropische Farne) [Tropical hothouse Ferns]	52.4548	13.3085	100	WGS 84	under stones	2013-05-15	E. N. Lindner	3♂♂, 7♀♀, 1 juv.	SMNG
Cylindrodesmus hirsutus Pocock, 1889	Berlin	Berlin	Botanischer Garten Dahlem der Freien Universität Berlin [Botanical Garden Berlin-Dahlem]	Gewächshaus F (Tropische und subtropische Farne) [Tropical hothouse Ferns]	52.4548	13.3085	100	WGS 84	under stones	2013-05-15	E. N. Lindner	1♀	SMNG
Cylindrodesmus hirsutus Pocock, 1889	Berlin	Berlin	Botanischer Garten Dahlem der Freien Universität Berlin [Botanical Garden Berlin-Dahlem]	Gewächshaus G (Bromeliengewächse) [Tropical hothouse Bromelias]	52.4548	13.3085	100	WGS 84	under leaves	2013-05-15	E. N. Lindner	8♀♀	SMNG
Cylindrodesmus hirsutus Pocock, 1889	Berlin	Berlin	Botanischer Garten Dahlem der Freien Universität Berlin [Botanical Garden Berlin-Dahlem]	tropical hothouses	52.4548	13.3085	100	WGS 84	under/in dead wood/bark	2005-04-29	H. Reip	4	SMNG
Cylindrodesmus hirsutus Pocock, 1889	Berlin	Berlin	Botanischer Garten Dahlem der Freien Universität Berlin [Botanical Garden Berlin-Dahlem]		52.4548	13.3085	100	WGS 84		05.200 & 08.2000	M. Zerm	only females			GOLOVATCH et al. (2000)
Cylindrodesmus hirsutus Pocock, 1889	Hesse	Frankfurt am Main	Palmengarten [Palm Garden]	Mangrove	50.1233	8.6559	100	WGS 84		10.10.-24.10.2008	E. Heußler	1	SMNG	pitfall traps, temperature 20-23 °C, humidity ca. 90%
Cylindrodesmus hirsutus Pocock, 1889	Hesse	Frankfurt am Main	Palmengarten [Palm Garden]	Regenwald [rain forest]	50.1233	8.6559	100	WGS 84		10.10.-24.10.2008	E. Heußler	1	SMNG	pitfall traps, temperature 20-22 °C, humidity ca. 70-80%
Cylindrodesmus hirsutus Pocock, 1889	Hesse	Frankfurt am Main	Palmengarten [Palm Garden]		50.1233	8.6559	100	WGS 84		2011-11-28	H. Reip	16	SMNG
Cylindrodesmus hirsutus Pocock, 1889	Hamburg	Hamburg	Loki-Schmidt-Garten [Loki-Schmidt Botanical Garden Hamburg]	tropical hothouses	53.5603	9.9858	100	WGS 84	under wood and dead leaves	2007-11-10	H. Reip	6♀♀	SMNG
Cylindrodesmus hirsutus Pocock, 1889	Northrhine-Westphalia	Köln [Cologne]	Flora [Botanical Garden Cologne]		50.9607	6.9692	100	WGS 84	under dead leaves	2007-08-14	P. Decker & N. Laufer	2♀♀	SMNG		DECKER & HANNIG (2011)
Cylindrodesmus hirsutus Pocock, 1889	Northrhine-Westphalia	Köln [Cologne]	Flora [Botanical Garden Cologne]		50.9607	6.9692	100	WGS 84	under dead wood and stones	2010-06-30	H. Reip	1♀	SMNG
Cylindrodesmus hirsutus Pocock, 1889	Saxony	Leipzig	Botanischer Garten Leipzig [Botanical Garden Leipzig]	Gewächshäuser, Haus 1 (Tropenhaus/Schmetterlingshaus) [Tropical hothouses, House 1, Butterfly house]	51.3283	12.3912	100	WGS 84	at dead wood	2013-04-03	E. N. Lindner	11	SMNG
Cylindrodesmus hirsutus Pocock, 1889	Saxony	Leipzig	Botanischer Garten Leipzig [Botanical Garden Leipzig]	Gewächshäuser, Haus 2 [Tropical hothouses, House 2]	51.3283	12.3912	100	WGS 84	at dead wood	2013-04-03	E. N. Lindner	3♂♂, 5♀♀, 3 juv.	SMNG
Cylindrodesmus hirsutus Pocock, 1889	Saxony	Leipzig	Zoologischer Garten Leipzig, Gondwanaland [Zoological Garden Leipzig, Gondwanaland]	Tropical Hothouse	51.3505	12.3716	100	WGS 84	at dead wood	2013-03-26	E. N. Lindner	10	SMNG
Cylindrodesmus hirsutus Pocock, 1889	Saxony	Leipzig	Zoologischer Garten Leipzig, Gondwanaland [Zoological Garden Leipzig, Gondwanaland]	Tropical Hothouse	51.3505	12.3716	100	WGS 84	at dead wood	2013-04-05	E. N. Lindner	10	SMNG
Cylindrodesmus hirsutus Pocock, 1889	Saxony	Leipzig	Zoologischer Garten Leipzig, Gondwanaland [Zoological Garden Leipzig, Gondwanaland]	Tropical Hothouse	51.3505	12.3716	100	WGS 84	at dead wood	2013-04-05	E. N. Lindner	5	SMNG
Cylindrodesmus hirsutus Pocock, 1889	Saxony	Leipzig	Zoologischer Garten Leipzig, Gondwanaland [Zoological Garden Leipzig, Gondwanaland]	Tropical Hothouse	51.3505	12.3716	100	WGS 84	at dead wood	2013-04-05	E. N. Lindner	1♂, 1♀	SMNG
Cylindrodesmus hirsutus Pocock, 1889	Saxony	Leipzig	Zoologischer Garten Leipzig, Gondwanaland [Zoological Garden Leipzig, Gondwanaland]	Tropical Hothouse	51.3505	12.3716	100	WGS 84	at dead wood	2013-04-05	E. N. Lindner	4	SMNG
Cylindrodesmus hirsutus Pocock, 1889	Rhineland-Palatinate	Mainz	Botanischer Garten der Johannes Gutenberg Universität Mainz [Botanical Garden Mainz]	tropical hothouses	49.9925	8.2454	100	WGS 84	under dead leaves	2006-11-04	P. Decker	10♀♀	SMNG		DECKER & HANNIG (2011)
Cylindrodesmus hirsutus Pocock, 1889	Lower Saxony	Oldenburg	Botanischer Garten Oldenburg [Botanical Garden Oldenburg]	Tropical hothouse	53.1486	8.1942	100	WGS 84	under dead wood	2013-11-29	H. Reip	4	SMNG
Cylindrodesmus hirsutus Pocock, 1889	Brandenburg	Potsdam	Botanischer Garten Potsdam [Botanical Garden Potsdam]	Victoriahaus (Haus 7) [Victoria house (house 7)]	52.404	13.025	100	WGS 84	under and in dead wood and under dead leaves	2009-11-07	H. Reip	24	SMNG	temperature 20-28°C
Cylindrodesmus hirsutus Pocock, 1889	Brandenburg	Potsdam	Biosphäre Potsdam (im BUGA-Park) [Biosphere Potsdam]	Tropenhaus [tropical hothouse]	52.4185	13.0486	100	WGS 84	at dead wood	2013-09-19	E. N. Lindner	2♀♀, 3 juv.	SMNG
Cylindroiulus britannicus (Verhoeff, 1891)	Berlin	Berlin	Gewächshäuser der Gartenbaugroßbetriebe Bermann Rothe (Beyroth) in Berlin-Zehlendorf [greenhouses of horticulture company Bermann Rothe (Beyroth) in Berlin-Zehlendorf]		52.432	13.258	3000	WGS 84			Boettger	zahlreich vertreten [numerous]			BOETTGER (1929)
Cylindroiulus britannicus (Verhoeff, 1891)	Berlin	Berlin	Botanischer Garten Dahlem der Freien Universität Berlin [Botanical Garden Berlin-Dahlem]	Gewächshaus K (Südafrika) [Tropical hothouse Southafrica]	52.4548	13.3085	100	WGS 84	under stones on sandy ground	2013-05-15	E. N. Lindner	2 juv.	SMNG
Cylindroiulus britannicus (Verhoeff, 1891)	Berlin	Berlin	Botanischer Garten Dahlem der Freien Universität Berlin [Botanical Garden Berlin-Dahlem]	Gewächshaus M (Australien und Neuseeland) [Tropical hothouse Australia and New Zealand]	52.4548	13.3085	100	WGS 84	under stones	2013-05-15	E. N. Lindner	1♂, 2 juv.	SMNG
Cylindroiulus britannicus (Verhoeff, 1891)	Berlin	Berlin	Botanischer Garten Dahlem der Freien Universität Berlin [Botanical Garden Berlin-Dahlem]	tropical hothouses	52.4548	13.3085	100	WGS 84			Boettger	zahlreich vertreten [numerous]			BOETTGER (1929)
Cylindroiulus britannicus (Verhoeff, 1891)	Berlin	Berlin	Botanischer Garten Dahlem der Freien Universität Berlin [Botanical Garden Berlin-Dahlem]	tropical hothouses	52.4548	13.3085	100	WGS 84					ZMB		SCHUBART (1929a)
Cylindroiulus britannicus (Verhoeff, 1891)	Berlin	Berlin	Botanischer Garten Dahlem der Freien Universität Berlin [Botanical Garden Berlin-Dahlem]	tropical hothouses	52.4548	13.3085	100	WGS 84			Eichler				EICHLER (1952)
Cylindroiulus britannicus (Verhoeff, 1891)	Northrhine-Westphalia	Bonn	Botanischer Garten der Friedrichs-Wilhelms-Universität Bonn [Botanical Garden Bonn]	Palmhaus [palm house]	50.7243	7.0913	100	WGS 84	dead wood	2007-08-14	P. Decker & N. Laufer	4♀♀, 3 juv.	SMNG
Cylindroiulus britannicus (Verhoeff, 1891)	Saxony	Dresden	Botanischer Garten der Technischen Universität Dresden [Botanical Garden Dresden]	Großes Tropenhaus [big tropical hothouse	51.0435	13.7582	100	WGS 84	dead wood	2012-01-07	P. Decker & S. Worch		SMNG
Cylindroiulus britannicus (Verhoeff, 1891)	Saxony	Dresden	Botanischer Garten der Technischen Universität Dresden [Botanical Garden Dresden]	Warmhäuser [hothouses]	51.0435	13.7582	100	WGS 84		1964-11-17					RICHTER (1967)
Cylindroiulus britannicus (Verhoeff, 1891)	Hamburg	Hamburg	Loki-Schmidt-Garten [Loki-Schmidt Botanical Garden Hamburg]	tropical hothouses	53.5603	9.9858	100	WGS 84	under wood and dead leaves	2007-11-10	H. Reip	1♂, 5♀♀	SMNG
Cylindroiulus britannicus (Verhoeff, 1891)	Northrhine-Westphalia	Kamen	Hothouse		51.59	7.66	5800	WGS 84		1905-04-15		4♂♂, 22♀♀, 19 juv.			VERHOEFF (1934)
Cylindroiulus britannicus (Verhoeff, 1891)	Schleswig-Holstein	Lübeck	Palmhaus [palm house]		53.867	10.687	5000	WGS 84							SCHUBART (1925)
Cylindroiulus britannicus (Verhoeff, 1891)	Brandenburg	Potsdam	Terrassengärtnerei Park Sanssouci [terrace nursery Park Sanssouce]	hothouses	52.404	13.025	100	WGS 84							SCHUBART (1929a)
Cylindroiulus caeruleocinctus (Wood, 1864)	Berlin	Berlin	Gewächshäuser der Gartenbaugroßbetriebe Bermann Rothe (Beyroth) in Berlin-Zehlendorf [greenhouses of horticulture company Bermann Rothe (Beyroth) in Berlin-Zehlendorf]		52.432	13.258	3000	WGS 84			Boettger				BOETTGER (1929)
Cylindroiulus caeruleocinctus (Wood, 1864)	Berlin	Berlin	Botanischer Garten Dahlem der Freien Universität Berlin [Botanical Garden Berlin-Dahlem]	tropical hothouses	52.4548	13.3085	100	WGS 84	in and under dead wood and bark	2005-04-29	H. Reip	1♀	SMNG
Cylindroiulus caeruleocinctus (Wood, 1864)	Berlin	Berlin	Botanischer Garten Dahlem der Freien Universität Berlin [Botanical Garden Berlin-Dahlem]	tropical hothouses	52.4548	13.3085	100	WGS 84			Boettger				BOETTGER (1929)
Cylindroiulus caeruleocinctus (Wood, 1864)	Berlin	Berlin	Botanischer Garten Dahlem der Freien Universität Berlin [Botanical Garden Berlin-Dahlem]	tropical hothouses	52.4548	13.3085	100	WGS 84							EICHLER (1952)
Cylindroiulus caeruleocinctus (Wood, 1864)	Hesse	Frankfurt am Main	Palmengarten [Palm Garden]	Subantarktishaus [subantarctic house]	50.1233	8.6559	100	WGS 84		11.04.2008-25.04.2008	E. Heußler	11	SMNG	pitfall traps, temperature 17-26 °C, humidity ca.70 %
Cylindroiulus caeruleocinctus (Wood, 1864)	Hesse	Frankfurt am Main	Palmengarten [Palm Garden]		50.1233	8.6559	100	WGS 84	between banana leaves	2008-11-08	H. Reip	1♀	SMNG
Cylindroiulus latestriatus (Curtis, 1845)	Berlin	Berlin	Botanischer Garten Dahlem der Freien Universität Berlin [Botanical Garden Berlin-Dahlem]	Agavenhaus [Agave house]	52.4548	13.3085	100	WGS 84			Eichler	2			EICHLER (1952)
Cylindroiulus latestriatus (Curtis, 1845)	Hesse	Frankfurt am Main	Palmengarten [Palm Garden]	Bromelarium [bromeliad house]	50.1233	8.6559	100	WGS 84		14.03.2008-28.03.2008	E. Heußler	1	SMNG	pitfall traps, temperature 20-23 °C, humidity ca. 60%
Cylindroiulus latestriatus (Curtis, 1845)	Hesse	Frankfurt am Main	Palmengarten [Palm Garden]	Savanne [savanna]	50.1233	8.6559	100	WGS 84		25.04.2008-09.05.2008	E. Heußler	2	SMNG	pitfall traps, temperature 17-26 °C, humidity ca.70 %
Cylindroiulus latestriatus (Curtis, 1845)	Schleswig-Holstein	Kiel	hothouse		54.32	10.14	10000	WGS 84		1922-11-08		1♂, 1♀	ZMB
Cylindroiulus latestriatus (Curtis, 1845)	Lower Saxony	Oldenburg	Botanischer Garten Oldenburg [Botanical Garden Oldenburg]	Tropical hothouse	53.1486	8.1942	100	WGS 84	under dead wood	2013-11-29	H. Reip	4♀, 2 juv.	SMNG
Cylindroiulus latestriatus (Curtis, 1845)	Brandenburg	Potsdam	Botanischer Garten Potsdam [Botanical Garden Potsdam]	Victoriahaus (Haus 7) [Victoria house (house 7)]	52.404	13.025	100	WGS 84	under and in dead wood and dead leaves	2009-11-07	H. Reip	9♂♂, 17♀♀	SMNG	temperature 20-28°C
Cylindroiulus punctatus (Leach, 1815)	Berlin	Berlin	Zoologischer Garten Berlin [Berlin Zoological Garden]	Vogelhaus [aviary], Freiflughalle Südostasien [free flight hall Southeast Asia]	52.5102	13.3366	100	WGS 84	under dead wood	2013-09-28	P. Decker & M. Köhler	1♀	SMNG
Cylindroiulus punctatus (Leach, 1815)	Berlin	Berlin	alter Botanischer Garten Berlin [old Botanical Garden Berlin]	tropical hothouses	52.4565	13.3074	100	WGS 84							EICHLER (1952)
Cylindroiulus truncorum (Silvestri, 1896)	Berlin	Berlin	Zoologischer Garten Berlin [Berlin Zoological Garden]	Vogelhaus [aviary], Freiflughalle Südostasien [free flight hall Southeast Asia]	52.5102	13.3366	100	WGS 84	under dead wood	2013-09-28	P. Decker & M. Köhler	1♀	SMNG
Cylindroiulus truncorum (Silvestri, 1896)	Berlin	Berlin	Botanischer Garten Dahlem der Freien Universität Berlin [Botanical Garden Berlin-Dahlem]	Gewächshaus B (Begonien) [Tropical hothouse Begonias]	52.4548	13.3085	100	WGS 84	at dead wood	2013-05-15	E. N. Lindner	1♀	SMNG
Cylindroiulus truncorum (Silvestri, 1896)	Berlin	Berlin	Botanischer Garten Dahlem der Freien Universität Berlin [Botanical Garden Berlin-Dahlem]	Gewächshaus B (Begonien) [Tropical hothouse Begonias]	52.4548	13.3085	100	WGS 84	under stone	2013-05-15	E. N. Lindner	2 juv.	SMNG
Cylindroiulus truncorum (Silvestri, 1896)	Berlin	Berlin	Botanischer Garten Dahlem der Freien Universität Berlin [Botanical Garden Berlin-Dahlem]	Gewächshaus D (Orchideen und Kannenpflanzen) [Tropical hothouse Orchids and Nepenthes]	52.4548	13.3085	100	WGS 84	at dead wood	2013-05-15	E. N. Lindner	1 juv.	SMNG
Cylindroiulus truncorum (Silvestri, 1896)	Berlin	Berlin	Botanischer Garten Dahlem der Freien Universität Berlin [Botanical Garden Berlin-Dahlem]	Gewächshaus D (Orchideen und Kannenpflanzen) [Tropical hothouse Orchids and Nepenthes]	52.4548	13.3085	100	WGS 84	under stones	2013-05-15	E. N. Lindner	4 juv.	SMNG
Cylindroiulus truncorum (Silvestri, 1896)	Berlin	Berlin	Botanischer Garten Dahlem der Freien Universität Berlin [Botanical Garden Berlin-Dahlem]	Gewächshaus F (Tropische und subtropische Farne) [Tropical hothouse Ferns]	52.4548	13.3085	100	WGS 84	under stones	2013-05-15	E. N. Lindner	1 juv.	SMNG
Cylindroiulus truncorum (Silvestri, 1896)	Berlin	Berlin	Botanischer Garten Dahlem der Freien Universität Berlin [Botanical Garden Berlin-Dahlem]	Gewächshaus K (Südafrika) [Tropical hothouse Southafrica]	52.4548	13.3085	100	WGS 84	at dead wood	2013-05-15	E. N. Lindner	1♂	SMNG
Cylindroiulus truncorum (Silvestri, 1896)	Berlin	Berlin	Botanischer Garten Dahlem der Freien Universität Berlin [Botanical Garden Berlin-Dahlem]	tropical hothouses	52.4548	13.3085	100	WGS 84		2004-03-19	H. Reip	3♂♂, 11 ind.	SMNG
Cylindroiulus truncorum (Silvestri, 1896)	Berlin	Berlin	Botanischer Garten Dahlem der Freien Universität Berlin [Botanical Garden Berlin-Dahlem]	tropical hothouses	52.4548	13.3085	100	WGS 84	in/under dead wood/bark	2005-04-29	H. Reip	25	SMNG
Cylindroiulus truncorum (Silvestri, 1896)	Berlin	Berlin	Botanischer Garten Dahlem der Freien Universität Berlin [Botanical Garden Berlin-Dahlem]	tropical hothouses	52.4548	13.3085	100	WGS 84			Boettger	3♂♂, „einige“ [some] ♀♀			BOETTGER (1929)
Cylindroiulus truncorum (Silvestri, 1896)	Berlin	Berlin	Botanischer Garten Dahlem der Freien Universität Berlin [Botanical Garden Berlin-Dahlem]	tropical hothouses	52.4548	13.3085	100	WGS 84					ZMB		SCHUBART (1929a)
Cylindroiulus truncorum (Silvestri, 1896)	Berlin	Berlin	Botanischer Garten Dahlem der Freien Universität Berlin [Botanical Garden Berlin-Dahlem]	tropical hothouses	52.4548	13.3085	100	WGS 84							EICHLER (1952)
Cylindroiulus truncorum (Silvestri, 1896)	Saxony	Dresden	Botanischer Garten der Technischen Universität Dresden [Botanical Garden Dresden]	Großes Tropenhaus [big tropical hothouse	51.0435	13.7582	100	WGS 84	dead wood	2012-01-07	P. Decker & S. Worch	2♂♂, 6♀♀.	SMNG
Cylindroiulus truncorum (Silvestri, 1896)	Saxony	Dresden	Botanischer Garten Dresden [Botanical Garden Dresden]	Warmhaus [hothouse]	51.0435	13.7582	100	WGS 84	at dead wood	2013-03-10	E. N. Lindner	1♂, 1♀	SMNG
Cylindroiulus truncorum (Silvestri, 1896)	Hesse	Frankfurt am Main	Palmengarten [Palm Garden]	Bromelarium [bromeliad house]	50.1233	8.6559	100	WGS 84		07.05.2008-23.05.2008	E. Heußler	1	SMNG	pitfall traps, temperature 20-23 °C, humidity ca. 60%
Cylindroiulus truncorum (Silvestri, 1896)	Hesse	Frankfurt am Main	Palmengarten [Palm Garden]	Monsun	50.1233	8.6559	100	WGS 84		2011-11-28	H. Reip	1♂, 1♀	SMNG
Cylindroiulus truncorum (Silvestri, 1896)	Hesse	Frankfurt am Main	Palmengarten [Palm Garden]	Nebelwald [cloud forest house]	50.1233	8.6559	100	WGS 84		25.04.2008-09.05.2008	E. Heußler	2	SMNG	pitfall traps, temperature 13-18 °C, humidity ca. 80%
Cylindroiulus truncorum (Silvestri, 1896)	Hesse	Frankfurt am Main	Palmengarten [Palm Garden]	Regenwald [rain forest]	50.1233	8.6559	100	WGS 84		14.03.2008-25.04.2008, 03.07.2008-17.07.2008	E. Heußler	14	SMNG	pitfall traps, temperature 20-22 °C, humidity ca. 70-80%
Cylindroiulus truncorum (Silvestri, 1896)	Hesse	Frankfurt am Main	Palmengarten [Palm Garden]	Regenwald [rain forest]	50.1233	8.6559	100	WGS 84	between banana leaves	2008-11-08	H. Reip	2♂♂, 1♀	SMNG
Cylindroiulus truncorum (Silvestri, 1896)	Hesse	Frankfurt am Main	Palmengarten [Palm Garden]	Regenwald [rain forest]	50.1233	8.6559	100	WGS 84	under wood and dead leaves	2011-11-28	H. Reip	1♂, 17♀♀	SMNG
Cylindroiulus truncorum (Silvestri, 1896)	Thuringia	Jena	Botanischer Garten der Friedrich-Schiller-Universität Jena [Botanical Garden Jena]	cool greenhouse	50.9308	11.5858	100	WGS 84	under flower pots	2008-04-11	H. Reip	4♂♂, 7 ind.	SMNG
Cylindroiulus truncorum (Silvestri, 1896)	Thuringia	Jena	Botanischer Garten der Friedrich-Schiller-Universität Jena [Botanical Garden Jena]	hothouse	50.9308	11.5858	100	WGS 84	under stones and in gravel soil	2008-04-11	H. Reip	several specimens	SMNG
Cylindroiulus truncorum (Silvestri, 1896)	Northrhine-Westphalia	Kamen	Hothouse		51.59	7.66	5800	WGS 84		1905-04-15		1♂, 3♀♀.			VERHOEFF (1934)
Cylindroiulus truncorum (Silvestri, 1896)	Baden-Württemberg	Karlsruhe	Botanischer Garten Karlsruhe [Botanical Garden Karlsruhe]	greenhouses, eastern big hothouse	49.0136	8.4011	100	WGS 84	under flower pots and dead wood	2010-04-13	H. Reip	♂, ♀, juv., 57 ind.	SMNG
Cylindroiulus truncorum (Silvestri, 1896)	Schleswig-Holstein	Kiel	Botanischer Garten der Christian-Albrechts-Universität zu Kiel [Botanical Garden Kiel]	Viktoria-Haus [Victoria house]	54.347	10.1158	100	WGS 84		07.11.1998–11.09.1999	Wilck, Adis & Golovatch			temperature 18-24°C, humidity 68-90%	WILCK (2000)
Cylindroiulus truncorum (Silvestri, 1896)	Northrhine-Westphalia	Köln [Cologne]	Flora [Botanical Garden Cologne]	tropical hothouse	50.9607	6.9692	100	WGS 84	under dead wood and stones	2010-06-30	H. Reip	3♂♂, 7♀♀, 3 juv.	SMNG
Cylindroiulus truncorum (Silvestri, 1896)	Northrhine-Westphalia	Köln [Cologne]	Flora [Botanical Garden Cologne]		50.9607	6.9692	100	WGS 84	dead wood	2007-08-14	P. Decker & N. Laufer	2♂♂, 1♀	SMNG		DECKER & HANNIG (2011)
Cylindroiulus truncorum (Silvestri, 1896)	Saxony	Leipzig	Leipzig-Heiterblick, Baumschule/Gartenbau Felgenträger [nursery garden and horticulture Felgenträger]	greenhouse	51.34	12.37	10000	WGS 84	under flower pots	2008-11-09	N. Lindner	5♂♂, 8♀♀		in winter no freezing but not heated
Cylindroiulus truncorum (Silvestri, 1896)	Saxony	Leipzig	Zoologischer Garten Leipzig, Gondwanaland [Zoological Garden Leipzig, Gondwanaland]	Tropical Hothouse	51.3505	12.3716	100	WGS 84	at dead wood	2013-03-26	E. N. Lindner	1♀	SMNG
Cylindroiulus truncorum (Silvestri, 1896)	Saxony-Anhalt	Magdeburg	Gruson-Gewächshäuser [Gruson greenhouses]	Bromelienhaus [bromeliad house	52.1139	11.6315	100	WGS 84	under pieces of bark on bark mulch	2012-06-13	H. Reip	several specimens	SMNG
Cylindroiulus truncorum (Silvestri, 1896)	Saxony-Anhalt	Magdeburg	Gruson-Gewächshäuser [Gruson greenhouses]	Großes Tropenhaus [big tropical house]	52.1139	11.6315	100	WGS 84	under pieces of wood on ground, under bark	2012-06-13	H. Reip	5♀♀, 24 juv.	SMNG
Cylindroiulus truncorum (Silvestri, 1896)	Saxony-Anhalt	Magdeburg	Gruson-Gewächshäuser [Gruson greenhouses]	Palmenhaus [palm house]	52.1139	11.6315	100	WGS 84	under pieces of wood on ground, under bark	2012-06-13	H. Reip	1 juv.	SMNG
Cylindroiulus truncorum (Silvestri, 1896)	Rhineland-Palatinate	Mainz	Botanischer Garten der Johannes Gutenberg Universität Mainz [Botanical Garden Mainz]	tropical hothouses	49.9925	8.2454	100	WGS 84	dead wood	2006-11-04	P. Decker	1♂, 2♀♀	SMNG
Cylindroiulus truncorum (Silvestri, 1896)	Bavaria	München [Munich]	Botanischer Garten München-Nymphenburg [Botanical Garden München-Nymphenburg]	greenhouse and Geweihfarnpavillon [elkhorn ferns pavilion]	48.1606	11.5021	100	WGS 84	in moist dead wood, under bark and upper soil	2009-05-28	H. Reip	several specimens	SMNG
Cylindroiulus truncorum (Silvestri, 1896)	Brandenburg	Potsdam	Botanischer Garten Potsdam [Botanical Garden Potsdam]	Bromelarium [bromeliad house]	52.404	13.025	100	WGS 84	under and in dead wood and dead leaves	2009-11-07	H. Reip	1♂, 3♀♀, 1 juv.	SMNG	temperature 14-23°C
Cylindroiulus truncorum (Silvestri, 1896)	Brandenburg	Potsdam	Botanischer Garten Potsdam [Botanical Garden Potsdam]	Palmenhaus (Haus 1) [palm house (house 1)]	52.404	13.025	100	WGS 84	in bark mulch	2009-11-07	H. Reip	6♂♂, 10♀♀, 8 juv.	SMNG	temperature 15-22°C
Cylindroiulus truncorum (Silvestri, 1896)	Brandenburg	Potsdam	Botanischer Garten Potsdam [Botanical Garden Potsdam]	Victoriahaus (Haus 7) [Victoria house (house 7)]	52.404	13.025	100	WGS 84	under and in dead wood and dead leaves	2009-11-07	H. Reip	4♂♂, 6♀♀, 1 juv.	SMNG	temperature 20-28°C
Cylindroiulus vulnerarius (Berlese, 1888)	Brandenburg	Potsdam	Botanischer Garten Potsdam [Botanical Garden Potsdam]	Bromelarium [bromeliad house]	52.404	13.025	100	WGS 84	under and in dead wood and under dead leaves	2009-11-07	H. Reip	1♂	SMNG	temperature 14-23°C
Cylindroiulus vulnerarius (Berlese, 1888)	Brandenburg	Potsdam	Botanischer Garten Potsdam [Botanical Garden Potsdam]	Palmenhaus (Haus 1) [palm house (house 1)]	52.404	13.025	100	WGS 84	in bark mulch	2009-11-07	H. Reip	1♀, 1 juv.	SMNG	temperature 15-22°C
Epinannolene sp.	Hesse	Frankfurt am Main	Palmengarten [Palm Garden]	Mangrove	50.1233	8.6559	100	WGS 84		25.04.2008-09.05.2008, 17.07.2008-31.07.2008, 28.08.2008-11.09.2008, 10.10.2008-24.10.2008	E. Heußler	4♂♂, 4♀♀	SMNG	pitfall traps, temperature 20-23 °C, humidity ca. 90%
Epinannolene sp.	Hesse	Frankfurt am Main	Palmengarten [Palm Garden]	Mangrove	50.1233	8.6559	100	WGS 84		2011-11-28	H. Reip	2♂♂, 3♀♀, 2 juv.	SMNG
Epinannolene sp.	Hesse	Frankfurt am Main	Palmengarten [Palm Garden]	Monsun	50.1233	8.6559	100	WGS 84		28.03.2008-11.04.2008	E. Heußler	2♂♂, 2♀♀	SMNG	pitfall traps, temperature 19-25 °C, humidity ca. 70-80%
Epinannolene sp.	Hesse	Frankfurt am Main	Palmengarten [Palm Garden]	Monsun	50.1233	8.6559	100	WGS 84		2011-11-28	H. Reip	8♂♂, 4♀♀, 2 juv.	SMNG
Epinannolene sp.	Hesse	Frankfurt am Main	Palmengarten [Palm Garden]	Regenwald [rain forest]	50.1233	8.6559	100	WGS 84		2011-11-28	H. Reip	1♂	SMNG
Epinannolene sp.	Hesse	Frankfurt am Main	Palmengarten [Palm Garden]	tropical hothouse	50.1233	8.6559	100	WGS 84	between banana leaves	2008-11-08	H. Reip	1♀	SMNG
Epinannolene trinidadensis Chamberlin, 1918	Saxony	Leipzig	Zoologischer Garten Leipzig, Gondwanaland [Zoological Garden Leipzig, Gondwanaland]	Tropical Hothouse	51.3505	12.3716	100	WGS 84	at dead wood	2013-03-26	E. N. Lindner	2♀♀, 7 juv.	SMNG
Epinannolene trinidadensis Chamberlin, 1918	Saxony	Leipzig	Zoologischer Garten Leipzig, Gondwanaland [Zoological Garden Leipzig, Gondwanaland]	Tropical Hothouse	51.3505	12.3716	100	WGS 84	at dead wood	2013-04-05	E. N. Lindner	1♂, 3♀♀, 2 juv.	SMNG
Epinannolene trinidadensis Chamberlin, 1918	Saxony	Leipzig	Zoologischer Garten Leipzig, Gondwanaland [Zoological Garden Leipzig, Gondwanaland]	Tropical Hothouse	51.3505	12.3716	100	WGS 84	at dead wood	2013-04-05	E. N. Lindner	1♀	SMNG
Kryphioiulus occultus (C. L. Koch, 1847)	Berlin	Berlin	Botanischer Garten Dahlem der Freien Universität Berlin [Botanical Garden Berlin-Dahlem]	Gewächshaus L (Tierfangende Pflanzen und Pflanzen der Südhemisphäre) [Tropical hothouse Carnivorous plants]	52.4548	13.3085	100	WGS 84	under stone	2013-05-15	E. N. Lindner	1♀	SMNG
Kryphioiulus occultus (C. L. Koch, 1847)	Berlin	Berlin	Botanischer Garten Dahlem der Freien Universität Berlin [Botanical Garden Berlin-Dahlem]	tropical hothouses	52.4548	13.3085	100	WGS 84			Eichler	2	ZMB?		EICHLER (1952)
Leptogoniulus sorornus (Butler, 1876)	Berlin	Berlin	Zoologischer Garten Berlin [Berlin Zoological Garden]	Vogelhaus [aviary], Freiflughalle Südostasien [free flight hall Southeast Asia]	52.5102	13.3366	100	WGS 84	under dead wood	2013-09-28	P. Decker & M. Köhler	1 ♀	SMNG
Leptogoniulus sorornus (Butler, 1876)	Saxony	Leipzig	Zoologischer Garten Leipzig, Gondwanaland [Zoological Garden Leipzig, Gondwanaland]	Tropical Hothouse	51.3505	12.3716	100	WGS 84	at dead wood	2013-04-05	E. N. Lindner	1♂	SMNG
Leptogoniulus sorornus (Butler, 1876)	Saxony	Leipzig	Zoologischer Garten Leipzig, Gondwanaland [Zoological Garden Leipzig, Gondwanaland]	Tropical Hothouse	51.3505	12.3716	100	WGS 84	at dead wood	2013-03-26	E. N. Lindner	2♂♂, 3♀♀	SMNG
Leptogoniulus sorornus (Butler, 1876)	Saxony	Leipzig	Zoologischer Garten Leipzig, Gondwanaland [Zoological Garden Leipzig, Gondwanaland]	Tropical Hothouse	51.3505	12.3716	100	WGS 84	at dead wood	2013-07-28	E. N. Lindner	1♂	SMNG
Leptogoniulus sorornus (Butler, 1876)	Saxony	Leipzig	Zoologischer Garten Leipzig, Gondwanaland [Zoological Garden Leipzig, Gondwanaland]	Tropical Hothouse	51.3505	12.3716	100	WGS 84	at dead wood	2013-03-26	E. N. Lindner	1♂	SMNG
Leptogoniulus sorornus (Butler, 1876)	Saxony	Leipzig	Zoologischer Garten Leipzig, Gondwanaland [Zoological Garden Leipzig, Gondwanaland]	Tropical Hothouse	51.3505	12.3716	100	WGS 84	at dead wood	2013-04-05	E. N. Lindner	3♀♀, 1 juv.	SMNG
Leptogoniulus sorornus (Butler, 1876)	Saxony	Leipzig	Zoologischer Garten Leipzig, Gondwanaland [Zoological Garden Leipzig, Gondwanaland]	Tropical Hothouse	51.3505	12.3716	100	WGS 84	under stone	2013-04-05	E. N. Lindner	2♀♀	SMNG
Leptogoniulus sorornus (Butler, 1876)	Saxony	Leipzig	Zoologischer Garten Leipzig, Gondwanaland [Zoological Garden Leipzig, Gondwanaland]	Tropical Hothouse	51.3505	12.3716	100	WGS 84	at trunc of palm tree	2013-04-05	E. N. Lindner	2♀♀	SMNG
Leptogoniulus sorornus (Butler, 1876)	Saxony	Leipzig	Zoologischer Garten Leipzig, Gondwanaland [Zoological Garden Leipzig, Gondwanaland]	Tropical Hothouse	51.3505	12.3716	100	WGS 84	at dead wood	2013-04-05	E. N. Lindner	3 juv.	SMNG
Leptogoniulus sorornus (Butler, 1876)	Saxony	Leipzig	Zoologischer Garten Leipzig, Gondwanaland [Zoological Garden Leipzig, Gondwanaland]	Tropical Hothouse	51.3505	12.3716	100	WGS 84	at dead wood	2013-04-05	E. N. Lindner	2 juv.	SMNG
Leptogoniulus sorornus (Butler, 1876)	Saxony	Leipzig	Zoologischer Garten Leipzig, Gondwanaland [Zoological Garden Leipzig, Gondwanaland]	Tropical Hothouse	51.3505	12.3716	100	WGS 84	at dead wood	Mrz-Apr 2013	E. N. Lindner	1♂, 4♀♀, 7 ind.	SMNG
Melogona voigtii (Verhoeff, 1899)	Berlin	Berlin	Botanischer Garten Dahlem der Freien Universität Berlin [Botanical Garden Berlin-Dahlem]	tropical hothouses	52.4548	13.3085	100	WGS 84							EICHLER (1952)
Mesoiulus gridellii Strasser, 1934	Hesse	Frankfurt am Main	Palmengarten [Palm Garden]	Regenwald [rain forest]	50.1233	8.6559	100	WGS 84		11.04.2008-25.04.2008	E. Heußler	1♂	SMNG	pitfall traps, temperature 20-22 °C, humidity ca. 70-80%
Nopoiulus kochii (Gervais, 1847)	Berlin	Berlin	Zoologischer Garten Berlin [Berlin Zoological Garden]	Vogelhaus [aviary], Freiflughalle Südostasien [free flight hall Southeast Asia]	52.5102	13.3366	100	WGS 84	under dead wood	2013-09-28	P. Decker & M. Köhler	1♀	SMNG
Nopoiulus kochii (Gervais, 1847)	Berlin	Berlin	Botanischer Garten Dahlem der Freien Universität Berlin [Botanical Garden Berlin-Dahlem]	Gewächshaus M (Australien und Neuseeland) [Tropical hothouse Australia and New Zealand]	52.4548	13.3085	100	WGS 84	under stones	2013-05-15	E. N. Lindner	1 juv.	SMNG
Nopoiulus kochii (Gervais, 1847)	Berlin	Berlin	Botanischer Garten Dahlem der Freien Universität Berlin [Botanical Garden Berlin-Dahlem]	tropical hothouses	52.4548	13.3085	100	WGS 84					ZMB		SCHUBART (1929a)
Nopoiulus kochii (Gervais, 1847)	Berlin	Berlin	Botanischer Garten Dahlem der Freien Universität Berlin [Botanical Garden Berlin-Dahlem]	tropical hothouses	52.4548	13.3085	100	WGS 84			Eichler				EICHLER (1952)
Nopoiulus kochii (Gervais, 1847)	Hesse	Frankfurt am Main	Palmengarten [Palm Garden]	Palmenhaus [palm house]	50.1233	8.6559	100	WGS 84		28.08.-10.10.2008	E. Heußler	1♂, 1♀, 15 ind.	SMNG	pitfall traps, temperature 13-24 °C, humidity ca. 60%
Nopoiulus kochii (Gervais, 1847)	Hesse	Frankfurt am Main	Palmengarten [Palm Garden]	Regenwald [rain forest]	50.1233	8.6559	100	WGS 84		28.08.-25.09.2008	E. Heußler	3♂♂, 3♀♀, 10 ind.	SMNG	pitfall traps, temperature 20-22 °C, humidity ca. 70-80%
Nopoiulus kochii (Gervais, 1847)	Hesse	Frankfurt am Main	Palmengarten [Palm Garden]	Regenwald [rain forest]	50.1233	8.6559	100	WGS 84		2011-11-28	H. Reip	4♂♂	SMNG
Nopoiulus kochii (Gervais, 1847)	Northrhine-Westphalia	Kamen	Hothouse		51.59	7.66	5800	WGS 84		1905-04-15		ein Dutzend meist unreife Individuen [a dozen of predominatly immature specimens]			VERHOEFF (1934)
Nopoiulus kochii (Gervais, 1847)	Schleswig-Holstein	Kiel	Botanischer Garten der Christian-Albrechts-Universität zu Kiel [Botanical Garden Kiel]	Viktoria-Haus [Victoria house]	54.347	10.1158	100	WGS 84		07.11.1998–11.09.1999	Wilck, Adis & Golovatch			temperature 18-24°C, humidity 68-90%	WILCK (2000)
Nopoiulus kochii (Gervais, 1847)	Brandenburg	Potsdam	Terrassengärtnerei Park Sanssouci [terrace nursery Park Sanssouce]	hothouses	52.404	13.025	100	WGS 84	under and in dead wood and under dead leaves				ZMB		SCHUBART (1929a)
Nopoiulus kochii (Gervais, 1847)	Brandenburg	Potsdam	Botanischer Garten Potsdam [Botanical Garden Potsdam]	Bromelarium [bromeliad house]	52.404	13.025	100	WGS 84	under and in dead wood and under dead leaves	2009-11-07	H. Reip	1♂, 1♀	SMNG	temperature 14-23°C
Nopoiulus kochii (Gervais, 1847)	Brandenburg	Potsdam	Botanischer Garten Potsdam [Botanical Garden Potsdam]	Kakteen- und Sukulentenhaus (Haus 5) [cactus and succulent house (house 5)]	52.404	13.025	100	WGS 84	under stones	2009-11-07	H. Reip	15	SMNG	temperature 12-20°C
Nopoiulus kochii (Gervais, 1847)	Brandenburg	Potsdam	Botanischer Garten Potsdam [Botanical Garden Potsdam]	Palmenhaus (Haus 1) [palm house (house 1)]	52.404	13.025	100	WGS 84	in bark mulch	2009-11-07	H. Reip	1♂, 5♀♀, 2 juv.	SMNG	temperature 15-22°C
Nopoiulus kochii (Gervais, 1847)	Brandenburg	Potsdam	Botanischer Garten Potsdam [Botanical Garden Potsdam]	Victoriahaus (Haus 7) [Victoria house (house 7)]	52.404	13.025	100	WGS 84		2009-11-07	H. Reip	1♂	SMNG	temperature 20-28°C
Ommatoiulus sabulosus (Linnaeus, 1758)	Berlin	Berlin	Botanischer Garten Dahlem der Freien Universität Berlin [Botanical Garden Berlin-Dahlem]	tropical hothouses	52.4548	13.3085	100	WGS 84							EICHLER (1952)
Oxidus gracilis (C. L. Koch, 1847)	Bavaria	Bayreuth	Ökologisch-Botanischer Garten Universität Bayreuth [Ecological Botanical Garden Bayreuth]	Nebelwaldhaus [cloud forest house]	49.9257	11.5841	100	WGS 84	on the ground between lava stones	2012-01-23	A. Berthold	1 juv. ♀	SMNG
Oxidus gracilis (C. L. Koch, 1847)	Bavaria	Bayreuth	Ökologisch-Botanischer Garten Universität Bayreuth [Ecological Botanical Garden Bayreuth]	Venlo Block	49.9257	11.5841	100	WGS 84	on soil in flower pot	2012-02-16	H. Hennig	1♀	SMNG
Oxidus gracilis (C. L. Koch, 1847)	Berlin	Berlin	Gewächshäuser der Gartenbaugroßbetriebe Bermann Rothe (Beyroth) in Berlin-Zehlendorf [greenhouses of horticulture company Bermann Rothe (Beyroth) in Berlin-Zehlendorf]		52.432	13.258	3000	WGS 84			Boettger	recht häufig [quite frequent]			BOETTGER (1929)
Oxidus gracilis (C. L. Koch, 1847)	Berlin	Berlin	Zoologischer Garten Berlin [Berlin Zoological Garden]	Vogelhaus [aviary], Freiflughalle Australien [free flight hall Australia]	52.5102	13.3366	100	WGS 84	under stones	2013-09-28	P. Decker & M. Köhler	1♂	SMNG	individual already dead
Oxidus gracilis (C. L. Koch, 1847)	Berlin	Berlin	nursery	hothouses	52.52	13.39	20000	WGS 84							SCHUBART (1929a)
Oxidus gracilis (C. L. Koch, 1847)	Berlin	Berlin	Zoologischer Garten Berlin [Berlin Zoological Garden]	Vogelhaus [aviary], Freiflughalle Südostasien [free flight hall Southeast Asia]	52.5102	13.3366	100	WGS 84	under dead wood	2013-09-28	P. Decker & M. Köhler	2♂♂, 4 juv.	SMNG
Oxidus gracilis (C. L. Koch, 1847)	Berlin	Berlin	Botanischer Garten Dahlem der Freien Universität Berlin [Botanical Garden Berlin-Dahlem]	Gewächshaus A (Großes Tropenhaus / Tropischer Regenwald) [Great tropical hothouse / Tropical Rainforest]	52.4548	13.3085	100	WGS 84	under mulch	2013-05-15	E. N. Lindner	1♀	SMNG
Oxidus gracilis (C. L. Koch, 1847)	Berlin	Berlin	Botanischer Garten Dahlem der Freien Universität Berlin [Botanical Garden Berlin-Dahlem]	Gewächshaus A (Großes Tropenhaus / Tropischer Regenwald) [Great tropical hothouse / Tropical Rainforest]	52.4548	13.3085	100	WGS 84	in mulch	2013-05-15	E. N. Lindner	1♂	SMNG
Oxidus gracilis (C. L. Koch, 1847)	Berlin	Berlin	Botanischer Garten Dahlem der Freien Universität Berlin [Botanical Garden Berlin-Dahlem]	Gewächshaus D (Orchideen und Kannenpflanzen) [Tropical hothouse Orchids and Nepenthes]	52.4548	13.3085	100	WGS 84	under stones	2013-05-15	E. N. Lindner	1♂	SMNG
Oxidus gracilis (C. L. Koch, 1847)	Berlin	Berlin	Botanischer Garten Dahlem der Freien Universität Berlin [Botanical Garden Berlin-Dahlem]	Gewächshaus F (Tropische und subtropische Farne) [Tropical hothouse Ferns]	52.4548	13.3085	100	WGS 84	under stones	2013-05-15	E. N. Lindner	1♂, 1♀	SMNG
Oxidus gracilis (C. L. Koch, 1847)	Berlin	Berlin	Botanischer Garten Dahlem der Freien Universität Berlin [Botanical Garden Berlin-Dahlem]	Gewächshaus F (Tropische und subtropische Farne) [Tropical hothouse Ferns]	52.4548	13.3085	100	WGS 84	under stones	2013-05-15	E. N. Lindner	1♀, 5 juv.	SMNG
Oxidus gracilis (C. L. Koch, 1847)	Berlin	Berlin	Botanischer Garten Dahlem der Freien Universität Berlin [Botanical Garden Berlin-Dahlem]	Gewächshaus G (Bromeliengewächse) [Tropical hothouse Bromelias]	52.4548	13.3085	100	WGS 84	in mulch	2013-05-15	E. N. Lindner	2♂♂	SMNG
Oxidus gracilis (C. L. Koch, 1847)	Berlin	Berlin	Botanischer Garten Dahlem der Freien Universität Berlin [Botanical Garden Berlin-Dahlem]	Gewächshaus K (Südafrika) [Tropical hothouse Southafrica]	52.4548	13.3085	100	WGS 84	at dead wood	2013-05-15	E. N. Lindner	1♂, 2♀♀	SMNG
Oxidus gracilis (C. L. Koch, 1847)	Berlin	Berlin	Botanischer Garten Dahlem der Freien Universität Berlin [Botanical Garden Berlin-Dahlem]	Gewächshaus L (Tierfangende Pflanzen und Pflanzen der Südhemisphäre) [Tropical hothouse Carnivorous plants]	52.4548	13.3085	100	WGS 84	under stone	2013-05-15	E. N. Lindner	1♂, 2♀♀, 1 juv.	SMNG
Oxidus gracilis (C. L. Koch, 1847)	Berlin	Berlin	Botanischer Garten Dahlem der Freien Universität Berlin [Botanical Garden Berlin-Dahlem]	Gewächshaus M (Australien und Neuseeland) [Tropical hothouse Australia and New Zealand]	52.4548	13.3085	100	WGS 84	under stones	2013-05-15	E. N. Lindner	1♂, 5 juv.	SMNG
Oxidus gracilis (C. L. Koch, 1847)	Berlin	Berlin	Botanischer Garten Dahlem der Freien Universität Berlin [Botanical Garden Berlin-Dahlem]	Gewächshaus M (Australien und Neuseeland) [Tropical hothouse Australia and New Zealand]	52.4548	13.3085	100	WGS 84	at dead wood	2013-05-15	E. N. Lindner	2 juv.	SMNG
Oxidus gracilis (C. L. Koch, 1847)	Berlin	Berlin	Botanischer Garten Dahlem der Freien Universität Berlin [Botanical Garden Berlin-Dahlem]	hothouse	52.4548	13.3085	100	WGS 84			Dahl	♂			VERHOEFF(1907)
Oxidus gracilis (C. L. Koch, 1847)	Berlin	Berlin	Botanischer Garten Dahlem der Freien Universität Berlin [Botanical Garden Berlin-Dahlem]	Palmenhaus [palm house]	52.4548	13.3085	100	WGS 84							SCHUBART (1934)
Oxidus gracilis (C. L. Koch, 1847)	Berlin	Berlin	Botanischer Garten Dahlem der Freien Universität Berlin [Botanical Garden Berlin-Dahlem]	Palmenhaus, Gewürzpflanzenhaus, Ostasienhaus [palm house, spice plant house, East Asia house]	52.4548	13.3085	100	WGS 84			Eichler				EICHLER (1952)
Oxidus gracilis (C. L. Koch, 1847)	Berlin	Berlin	cemetary nursery in Eythstraße	hothouse	52.459	13.364	250	WGS 84							SCHUBART (1957)
Oxidus gracilis (C. L. Koch, 1847)	Berlin	Berlin	Botanischer Garten Dahlem der Freien Universität Berlin [Botanical Garden Berlin-Dahlem]	tropical hothouses	52.4548	13.3085	100	WGS 84	in/under dead wood or bark	2005-04-29	H. Reip	5	SMNG
Oxidus gracilis (C. L. Koch, 1847)	Berlin	Berlin	Botanischer Garten Dahlem der Freien Universität Berlin [Botanical Garden Berlin-Dahlem]	tropical hothouses	52.4548	13.3085	100	WGS 84		1927-1928	Boettger	zahlreich vertreten [numerous individuals]			BOETTGER (1929)
Oxidus gracilis (C. L. Koch, 1847)	Berlin	Berlin	Botanischer Garten Dahlem der Freien Universität Berlin [Botanical Garden Berlin-Dahlem]	tropical hothouses	52.4548	13.3085	100	WGS 84					ZMB?		SCHUBART (1929a)
Oxidus gracilis (C. L. Koch, 1847)	Northrhine-Westphalia	Bochum	Botanischer Garten der Ruhr-Universität Bochum [Botanical Garden Bochum]	tropical hothouse	51.4894	11.9591	100	WGS 84		11.2005	C. Schmidt
Oxidus gracilis (C. L. Koch, 1847)	Northrhine-Westphalia	Bonn	Warmhaus des Herrn Biesing [hothouse of Mr. Biesing]		50.7315	7.0977	3240	WGS 84		08.08.1890	K. W. Verhoeff		ZMB		VERHOEFF (1891)
Oxidus gracilis (C. L. Koch, 1847)	Northrhine-Westphalia	Bonn	Botanischer Garten der Friedrichs-Wilhelms-Universität Bonn [Botanical Garden Bonn]	Palmhaus [palm house]	50.7243	7.0913	100	WGS 84	under leaf litter, on soil	2007-08-14	P. Decker & N. Laufer	1♂, 2♀♀, 2 juv.	SMNG
Oxidus gracilis (C. L. Koch, 1847)	Saxony	Dresden	Botanischer Garten der Technischen Universität Dresden [Botanical Garden Dresden]	Großes Tropenhaus [big tropical hothouse	51.0435	13.7582	100	WGS 84	under leaf litter, on soil	2012-01-07	P. Decker & S. Worch	2♂♂, 3♀♀, 4 juv.	SMNG
Oxidus gracilis (C. L. Koch, 1847)	Saxony	Dresden	Botanischer Garten der Technischen Universität Dresden [Botanical Garden Dresden]	Victoria-Haus, Tropenhaus [Victoria house, tropical hothouse]	51.0435	13.7582	100	WGS 84	under leaf litter, on soil	2012-01-07	P. Decker & S. Worch	1♂, 1♀, 1 juv.	SMNG
Oxidus gracilis (C. L. Koch, 1847)	Saxony	Dresden	Botanischer Garten der Technischen Universität Dresden [Botanical Garden Dresden]	Warmhäuser [hothouses]	51.0435	13.7582	100	WGS 84		13.11.1964, 17.11.1964, 21.11.1964	H. Richter	35	SMNG		RICHTER (1967)
Oxidus gracilis (C. L. Koch, 1847)	Saxony	Dresden	Botanischer Garten Dresden [Botanical Garden Dresden]	Warmhaus [hothouse]	51.0435	13.7582	100	WGS 84	under leaves, stones and other	2013-03-10	E. N. Lindner	5♂♂, 3 juv.	SMNG
Oxidus gracilis (C. L. Koch, 1847)	Northrhine-Westphalia	Duisburg	greenhouse		51.43	6.76	10000	WGS 84		1987-11-20	Beckers	1 juv.
Oxidus gracilis (C. L. Koch, 1847)	Hesse	Frankfurt am Main	Palmengarten [Palm Garden]	Bromelarium [bromeliad house]	50.1233	8.6559	100	WGS 84		23.07.2008-17.07.2008	E. Heußler	9	SMNG	pitfall traps, temperature 20-23 °C, humidity ca. 60%
Oxidus gracilis (C. L. Koch, 1847)	Hesse	Frankfurt am Main	Palmengarten [Palm Garden]	Mangrove	50.1233	8.6559	100	WGS 84		2011-11-28	H. Reip	1	SMNG
Oxidus gracilis (C. L. Koch, 1847)	Hesse	Frankfurt am Main	Palmengarten [Palm Garden]	Monsun	50.1233	8.6559	100	WGS 84		2011-11-28	H. Reip	1♀	SMNG
Oxidus gracilis (C. L. Koch, 1847)	Hesse	Frankfurt am Main	Palmengarten [Palm Garden]	Nebelwald [cloud forest house]	50.1233	8.6559	100	WGS 84		06.06.2008-03.07.2008	E. Heußler	25	SMNG	pitfall traps, temperature 13-18 °C, humidity ca. 80%
Oxidus gracilis (C. L. Koch, 1847)	Hesse	Frankfurt am Main	Palmengarten [Palm Garden]	Regenwald [rain forest]	50.1233	8.6559	100	WGS 84		2011-11-28	H. Reip	1♂, 1♀, 3 juv.	SMNG
Oxidus gracilis (C. L. Koch, 1847)	Hesse	Frankfurt am Main	Palmengarten [Palm Garden]	tropical hothouse	50.1233	8.6559	100	WGS 84	between banana leaves	2008-11-08	H. Reip	1 juv.	SMNG
Oxidus gracilis (C. L. Koch, 1847)	Hesse	Gießen	Botanischer Garten der Justus-Liebig-Universität Gießen [Botanical Garden Gießen]		50.5864	8.6789	100	WGS 84		1973-1974		9			LÄFFERT (1984)
Oxidus gracilis (C. L. Koch, 1847)	Saxony-Anhalt	Halle (Saale)	Botanischer Garten der Martin-Luther-Universität Halle-Wittenberg [Botanical Garden Halle]	tropical hothouse	51.4894	11.9591	100	WGS 84	under dead wood	2011-05-09	H. Reip	3♂♂, 3♀♀, 8 juv.	SMNG
Oxidus gracilis (C. L. Koch, 1847)	Saxony-Anhalt	Halle (Saale)	hothouse		51.479	11.964	6000	WGS 84							SCHUBART (1934)
Oxidus gracilis (C. L. Koch, 1847)	Hamburg	Hamburg	hothouses of the nursery Richers		53.55	9.99	10000	WGS 84				1♀, zahlreiche juv. [numerous juv.]			LATZEL (1895)
Oxidus gracilis (C. L. Koch, 1847)	Hamburg	Hamburg	Loki-Schmidt-Garten [Loki-Schmidt Botanical Garden Hamburg]	tropical hothouses	53.5603	9.9858	100	WGS 84	under dead wood and dead leaves	2007-11-10	H. Reip	1♂	SMNG
Oxidus gracilis (C. L. Koch, 1847)	Lower Saxony	Hannover	hothouse		52.37	9.74	10000	WGS 84							SCHUBART (1934)
Oxidus gracilis (C. L. Koch, 1847)	Thuringia	Jena	Botanischer Garten der Friedrich-Schiller-Universität Jena [Botanical Garden Jena]	cool greenhouse	50.9308	11.5858	100	WGS 84	under flower pots	2008-04-11	H. Reip	1 juv.	SMNG
Oxidus gracilis (C. L. Koch, 1847)	Thuringia	Jena	Botanischer Garten der Friedrich-Schiller-Universität Jena [Botanical Garden Jena]	greenhouse	50.9308	11.5858	100	WGS 84		2004-03-19	H. Reip	5	SMNG
Oxidus gracilis (C. L. Koch, 1847)	Thuringia	Jena	Botanischer Garten der Friedrich-Schiller-Universität Jena [Botanical Garden Jena]	hothouse	50.9308	11.5858	100	WGS 84	under stones and in gravel soil	2008-04-11	H. Reip	4	SMNG
Oxidus gracilis (C. L. Koch, 1847)	Thuringia	Jena	Botanischer Garten der Friedrich-Schiller-Universität Jena [Botanical Garden Jena]	tropical hothouse	50.9308	11.5858	100	WGS 84	under stones	2004-03-15	H. Reip	2♂♂, 3♀♀	SMNG
Oxidus gracilis (C. L. Koch, 1847)	Baden-Württemberg	Karlsruhe	Botanischer Garten Karlsruhe [Botanical Garden Karlsruhe]	greenhouses, eastern big hothouse	49.0136	8.4011	100	WGS 84	under flower pots and dead wood	2010-04-13	H. Reip	3♂♂, 6♀♀, 3 juv.	SMNG
Oxidus gracilis (C. L. Koch, 1847)	Schleswig-Holstein	Kiel	Botanischer Garten der Christian-Albrechts-Universität zu Kiel [Botanical Garden Kiel]	Viktoria-Haus [Victoria house]	54.347	10.1158	100	WGS 84		07.11.1998–11.09.1999	Wilck, Adis & Golovatch			temperature 18-24°C, humidity 68-90%	WILCK (2000)
Oxidus gracilis (C. L. Koch, 1847)	Northrhine-Westphalia	Köln [Cologne]	Flora [Botanical Garden Cologne]	tropical hothouse	50.9607	6.9692	100	WGS 84	under dead wood and stones	2010-06-30	H. Reip	8	SMNG
Oxidus gracilis (C. L. Koch, 1847)	Baden-Württemberg	Konstanz	Mainau	Schmetterlingshaus [butterfly house]	47.7068	9.1951	100	WGS 84		2012-04-21	N. Lindner	1♂
Oxidus gracilis (C. L. Koch, 1847)	Saxony	Leipzig	Botanischer Garten Leipzig [Botanical Garden Leipzig]	Gewächshäuser [Tropical hothouses]	51.3283	12.3912	100	WGS 84		1995-11-30	E. N. Lindner	several ind.	SMNG
Oxidus gracilis (C. L. Koch, 1847)	Saxony	Leipzig	Botanischer Garten Leipzig [Botanical Garden Leipzig]	Gewächshäuser, Haus 2 [Tropical hothouses, House 2]	51.3283	12.3912	100	WGS 84	at dead wood	2013-03-18	D. Matzke	1♀	SMNG
Oxidus gracilis (C. L. Koch, 1847)	Saxony	Leipzig	Leipzig-Heiterblick, Baumschule/Gartenbau Felgenträger [nursery garden and horticulture Felgenträger]	greenhouse	51.34	12.37	10000	WGS 84	under flower pots	2008-11-09	N. Lindner	3♂♂, 3♀♀		in winter no freezing but not heated
Oxidus gracilis (C. L. Koch, 1847)	Saxony	Leipzig	Zoologischer Garten Leipzig, Gondwanaland [Zoological Garden Leipzig, Gondwanaland]	Tropical Hothouse	51.3505	12.3716	100	WGS 84	at dead wood	2013-04-05	E. N. Lindner	1♂, 1 juv.	SMNG
Oxidus gracilis (C. L. Koch, 1847)	Saxony	Leipzig	Zoologischer Garten Leipzig, Gondwanaland [Zoological Garden Leipzig, Gondwanaland]	Tropical Hothouse	51.3505	12.3716	100	WGS 84	at dead wood	2013-04-05	E. N. Lindner	1♀	SMNG
Oxidus gracilis (C. L. Koch, 1847)	Saxony	Leipzig	Zoologischer Garten Leipzig, Gondwanaland [Zoological Garden Leipzig, Gondwanaland]	Tropical Hothouse	51.3505	12.3716	100	WGS 84	at dead wood	2013-03-26	E. N. Lindner	2♂♂	SMNG
Oxidus gracilis (C. L. Koch, 1847)	Saxony-Anhalt	Magdeburg	Gruson-Gewächshäuser [Gruson greenhouses]	Anzuchtshaus [propagator house]	52.1139	11.6315	100	WGS 84	under flower pots on gravel	2012-06-13	H. Reip		SMNG
Oxidus gracilis (C. L. Koch, 1847)	Saxony-Anhalt	Magdeburg	Gruson-Gewächshäuser [Gruson greenhouses]	Anzuchtshaus [propagator house]	52.1139	11.6315	100	WGS 84	under flower pots, on wood grate	2012-06-13	H. Reip	2♂♂, 1♀	SMNG
Oxidus gracilis (C. L. Koch, 1847)	Saxony-Anhalt	Magdeburg	Gruson-Gewächshäuser [Gruson greenhouses]	Bromelienhaus [bromeliad house	52.1139	11.6315	100	WGS 84	under pieces of bark on bark mulch	2012-06-13	H. Reip	3♂♂	SMNG
Oxidus gracilis (C. L. Koch, 1847)	Saxony-Anhalt	Magdeburg	Gruson-Gewächshäuser [Gruson greenhouses]	Großes Tropenhaus [big tropical house]	52.1139	11.6315	100	WGS 84	under dead wood on the ground, under bark	2012-06-13	H. Reip	2♂♂, 1♀, 3 juv.	SMNG
Oxidus gracilis (C. L. Koch, 1847)	Saxony-Anhalt	Magdeburg	Gruson-Gewächshäuser [Gruson greenhouses]	Kleines Tropenhaus with Victoriahaus [small tropical house with Victoria house]	52.1139	11.6315	100	WGS 84	under stones	2012-06-13	H. Reip	1♂	SMNG
Oxidus gracilis (C. L. Koch, 1847)	Saxony-Anhalt	Magdeburg	Gruson-Gewächshäuser [Gruson greenhouses]	Orchideenhaus [orchid house]	52.1139	11.6315	100	WGS 84	under bag of peat on mix of peat and bark mulch	2012-06-13	H. Reip	1♂, 1♀	SMNG
Oxidus gracilis (C. L. Koch, 1847)	Saxony-Anhalt	Magdeburg	Gruson-Gewächshäuser [Gruson greenhouses]	Palmenhaus [palm house]	52.1139	11.6315	100	WGS 84	under palm bark on the ground	2012-06-13	H. Reip	4♂♂, 4♀♀	SMNG
Oxidus gracilis (C. L. Koch, 1847)	Rhineland-Palatinate	Mainz	Palmenhaus im Stadtpark [Palm house at city park]		49.9897	8.2893	100	WGS 84	on dead wood, on the ground and under dead leaves	1998-2009	P. Decker		SMNG
Oxidus gracilis (C. L. Koch, 1847)	Rhineland-Palatinate	Mainz	Botanischer Garten der Johannes Gutenberg Universität Mainz [Botanical Garden Mainz]	tropical hothouses	49.9925	8.2454	100	WGS 84	on dead wood, on the ground and under dead leaves	2006-11-04	P. Decker	, 7♂♂, 12♀♀, 9 juv.	SMNG
Oxidus gracilis (C. L. Koch, 1847)	Hesse	Marburg	Botanischer Garten Marburg [Botanical Garden Marburg]	houses 11, 12, 13, 15, 17, 18, 21, farn house	50.8024	8.8078	100	WGS 84		2012-02-15	M. Reich & S. Schaub-Grüssing	34	SMNG
Oxidus gracilis (C. L. Koch, 1847)	Mecklenburg-West Pomerania	Marlow	Vogelpark Marlow [ornithological park Marlow]	Tropical hothouse	54.1449	12.5692	100	WGS 84	under plants and on dead wood	2006-07-31	H. Reip	3	SMNG
Oxidus gracilis (C. L. Koch, 1847)	Bavaria	München [Munich]	Botanischer Garten München-Nymphenburg [Botanical Garden München-Nymphenburg]	hothouses	48.1606	11.5021	100	WGS 84							BOETTGER (1929)
Oxidus gracilis (C. L. Koch, 1847)	Lower Saxony	Oldenburg	Botanischer Garten Oldenburg [Botanical Garden Oldenburg]	Tropical hothouse	53.1486	8.1942	100	WGS 84	under dead wood	2013-11-29	H. Reip	1♂, 5♀, 3 juv.	SMNG
Oxidus gracilis (C. L. Koch, 1847)	Brandenburg	Potsdam	Botanischer Garten Potsdam [Botanical Garden Potsdam]	Bromelarium [bromeliad house]	52.404	13.025	100	WGS 84	under and in dead wood and under dead leaves	2009-11-07	H. Reip	10	SMNG	temperature 14-23°C
Oxidus gracilis (C. L. Koch, 1847)	Brandenburg	Potsdam	Botanischer Garten Potsdam [Botanical Garden Potsdam]	Palmenhaus (Haus 1) [palm house (house 1)]	52.404	13.025	100	WGS 84	in wood mulch	2009-11-07	H. Reip	2 juv.	SMNG	temperature 15-22°C
Oxidus gracilis (C. L. Koch, 1847)	Brandenburg	Potsdam	Botanischer Garten Potsdam [Botanical Garden Potsdam]	Victoriahaus (Haus 7) [Victoria house (house 7)]	52.404	13.025	100	WGS 84	under and in dead wood and under dead leaves	2009-11-07	H. Reip	13	SMNG	temperature 20-28°C
Oxidus gracilis (C. L. Koch, 1847)	Brandenburg	Potsdam	Gewächshäuser der Gartenbaugroßbetriebe Bermann Rothe (Beyroth) in Potsdam-Neubabelsberg [greenhouses of horticulture company Bermann Rothe (Beyroth) in Potsdam-Neubabelsberg]		52.399	13.104	3000	WGS 84							SCHUBART (1957)
Oxidus gracilis (C. L. Koch, 1847)	Brandenburg	Potsdam	Biosphäre Potsdam [Biosphere Potsdam]	tropical hothouse	52.4185	13.0486	100	WGS 84		1905-06-20	H. Hauser	very numerous	SMNG
Oxidus gracilis (C. L. Koch, 1847)	Saxony	Tharandt	Forstbotanischer Garten Tharandt - Sächsisches Landesarboretum [Forest Botanical Garden Tharandt - Saxonian Arboretum]	greenhouse	50.981	13.573	500	WGS 84		1966-07-23	H. Richter	2	SMNG
Paraspirobolus lucifugus (Gervais, 1836)	Berlin	Berlin	Botanischer Garten Dahlem der Freien Universität Berlin [Botanical Garden Berlin-Dahlem]	Araceenhaus, Baumfarnhaus [Araceae house, tree fern house]	52.4548	13.3085	100	WGS 84			Eichler	6	ZMB		EICHLER (1952)
Paraspirobolus lucifugus (Gervais, 1836)	Berlin	Berlin	Botanischer Garten Dahlem der Freien Universität Berlin [Botanical Garden Berlin-Dahlem]	Gewächshaus A (Großes Tropenhaus / Tropischer Regenwald) [Great tropical hothouse / Tropical Rainforest]	52.4548	13.3085	100	WGS 84	in mulch	2013-05-15	E. N. Lindner	2♂♂	SMNG
Paraspirobolus lucifugus (Gervais, 1836)	Berlin	Berlin	Botanischer Garten Dahlem der Freien Universität Berlin [Botanical Garden Berlin-Dahlem]	Gewächshaus A (Großes Tropenhaus / Tropischer Regenwald) [Great tropical hothouse / Tropical Rainforest]	52.4548	13.3085	100	WGS 84	unterhalb Pritchcardia affinis im Oberboden (hoher organ. Anteil, Mulm)	2013-05-15	E. N. Lindner	1♀, 3 juv.	SMNG
Paraspirobolus lucifugus (Gervais, 1836)	Berlin	Berlin	Botanischer Garten Dahlem der Freien Universität Berlin [Botanical Garden Berlin-Dahlem]	Gewächshaus A (Großes Tropenhaus / Tropischer Regenwald) [Great tropical hothouse / Tropical Rainforest]	52.4548	13.3085	100	WGS 84	at basis of Pritchcardia affinis	2013-05-15	E. N. Lindner	1 juv.	SMNG
Paraspirobolus lucifugus (Gervais, 1836)	Berlin	Berlin	Botanischer Garten Dahlem der Freien Universität Berlin [Botanical Garden Berlin-Dahlem]	Gewächshaus B (Begonien) [Tropical hothouse Begonias]	52.4548	13.3085	100	WGS 84	at dead wood	2013-05-15	E. N. Lindner	2♂♂	SMNG
Paraspirobolus lucifugus (Gervais, 1836)	Berlin	Berlin	Botanischer Garten Dahlem der Freien Universität Berlin [Botanical Garden Berlin-Dahlem]	Gewächshaus D (Orchideen und Kannenpflanzen) [Tropical hothouse Orchids and Nepenthes]	52.4548	13.3085	100	WGS 84	under stones	2013-05-15	E. N. Lindner	2♀♀, 1 juv.	SMNG
Paraspirobolus lucifugus (Gervais, 1836)	Berlin	Berlin	Botanischer Garten Dahlem der Freien Universität Berlin [Botanical Garden Berlin-Dahlem]	Gewächshaus D (Orchideen und Kannenpflanzen) [Tropical hothouse Orchids and Nepenthes]	52.4548	13.3085	100	WGS 84	at dead wood	2013-05-15	E. N. Lindner	1 juv.	SMNG
Paraspirobolus lucifugus (Gervais, 1836)	Berlin	Berlin	Botanischer Garten Dahlem der Freien Universität Berlin [Botanical Garden Berlin-Dahlem]	Gewächshaus F (Tropische und subtropische Farne) [Tropical hothouse Ferns]	52.4548	13.3085	100	WGS 84	under stones	2013-05-15	E. N. Lindner	1♀, 2 juv.	SMNG
Paraspirobolus lucifugus (Gervais, 1836)	Berlin	Berlin	Botanischer Garten Dahlem der Freien Universität Berlin [Botanical Garden Berlin-Dahlem]	Gewächshaus F (Tropische und subtropische Farne) [Tropical hothouse Ferns]	52.4548	13.3085	100	WGS 84	under stones	2013-05-15	E. N. Lindner	2 juv.	SMNG
Paraspirobolus lucifugus (Gervais, 1836)	Berlin	Berlin	Botanischer Garten Dahlem der Freien Universität Berlin [Botanical Garden Berlin-Dahlem]	Gewächshaus G (Bromeliengewächse) [Tropical hothouse Bromelias]	52.4548	13.3085	100	WGS 84	at dead wood	2013-05-15	E. N. Lindner	1♂	SMNG
Paraspirobolus lucifugus (Gervais, 1836)	Berlin	Berlin	Botanischer Garten Dahlem der Freien Universität Berlin [Botanical Garden Berlin-Dahlem]	Gewächshaus G (Bromeliengewächse) [Tropical hothouse Bromelias]	52.4548	13.3085	100	WGS 84	under stone	2013-05-15	E. N. Lindner	1♂, 1♀	SMNG
Paraspirobolus lucifugus (Gervais, 1836)	Berlin	Berlin	Botanischer Garten Dahlem der Freien Universität Berlin [Botanical Garden Berlin-Dahlem]	Palmenhaus [palm house]	52.4548	13.3085	100	WGS 84				1♀	ZMB		SCHUBART (1929a)
Paraspirobolus lucifugus (Gervais, 1836)	Berlin	Berlin	Botanischer Garten Dahlem der Freien Universität Berlin [Botanical Garden Berlin-Dahlem]	Palmenhaus [palm house]	52.4548	13.3085	100	WGS 84					ZMB		SCHUBART (1934)
Paraspirobolus lucifugus (Gervais, 1836)	Northrhine-Westphalia	Bonn	Botanischer Garten der Friedrichs-Wilhelms-Universität Bonn [Botanical Garden Bonn]	Palmhaus [palm house]	50.7243	7.0913	100	WGS 84	dead wood	2007-08-14	P. Decker & N. Laufer	1♂, 2♀♀, 2 juv.	SMNG		DECKER & HANNIG (2011)
Paraspirobolus lucifugus (Gervais, 1836)	Hesse	Frankfurt am Main	Palmengarten [Palm Garden]	Mangrove	50.1233	8.6559	100	WGS 84		2011-11-28	H. Reip	1♀	SMNG
Paraspirobolus lucifugus (Gervais, 1836)	Hamburg	Hamburg	Loki-Schmidt-Garten [Loki-Schmidt Botanical Garden Hamburg]	hothouse	53.5603	9.9858	100	WGS 84	under dead wood and dead leaves	2007-11-10	H. Reip	several individuals	SMNG
Paraspirobolus lucifugus (Gervais, 1836)	Saxony	Leipzig	Zoologischer Garten Leipzig, Gondwanaland [Zoological Garden Leipzig, Gondwanaland]	Tropical Hothouse	51.3505	12.3716	100	WGS 84	at trunc of palm tree	2013-03-26	E. N. Lindner	2♂♂	SMNG
Paraspirobolus lucifugus (Gervais, 1836)	Saxony	Leipzig	Zoologischer Garten Leipzig, Gondwanaland [Zoological Garden Leipzig, Gondwanaland]	Tropical Hothouse	51.3505	12.3716	100	WGS 84	at trunc of palm tree	2013-04-05	E. N. Lindner	1♀	SMNG
Polydesmus angustus Latzel, 1884	Saxony	Dresden	Botanischer Garten der Technischen Universität Dresden [Botanical Garden Dresden]	Großes Tropenhaus [big tropical hothouse	51.0435	13.7582	100	WGS 84	under dead wood	2012-01-07	P. Decker & S. Worch	1♂	SMNG
Polydesmus complanatus (Linnaeus, 1761)	Berlin	Berlin	alter Botanischer Garten Berlin [old Botanical Garden Berlin]	tropical hothouses	52.4565	13.3074	100	WGS 84							EICHLER (1952)
Polydesmus complanatus complanatus (Linnaeus, 1761)	Hamburg	Hamburg	Hamburg-Wandsbeck	greenhouses	53.583	10.085	1000	WGS 84							HAHMANN (1929a,b)
Polydesmus inconstans Latzel, 1884	Berlin	Berlin	Botanischer Garten Dahlem der Freien Universität Berlin [Botanical Garden Berlin-Dahlem]	Gewächshaus M (Australien und Neuseeland) [Tropical hothouse Australia and New Zealand]	52.4548	13.3085	100	WGS 84	under stones	2013-05-15	E. N. Lindner	1♂, 4 juv.	SMNG
Polydesmus inconstans Latzel, 1884	Berlin	Berlin	Botanischer Garten Dahlem der Freien Universität Berlin [Botanical Garden Berlin-Dahlem]	tropical hothouses	52.4548	13.3085	100	WGS 84			Eichler				EICHLER (1952)
Poratia digitata (Porat, 1889)	Berlin	Berlin	Botanischer Garten Dahlem der Freien Universität Berlin [Botanical Garden Berlin-Dahlem]	orchid house	52.4548	13.3085	100	WGS 84	under/in dead wood/bark	2005-04-29	H. Reip	2♀♀	SMNG
Poratia digitata (Porat, 1889)	Berlin	Berlin	Botanischer Garten Dahlem der Freien Universität Berlin [Botanical Garden Berlin-Dahlem]	tropical hothouses	52.4548	13.3085	100	WGS 84				1♀	ZMB		SCHUBART (1929a)
Poratia digitata (Porat, 1889)	Berlin	Berlin	Botanischer Garten Dahlem der Freien Universität Berlin [Botanical Garden Berlin-Dahlem]	tropical hothouses	52.4548	13.3085	100	WGS 84							EICHLER (1952)
Poratia digitata (Porat, 1889)	Saxony	Dresden	Botanischer Garten der Technischen Universität Dresden [Botanical Garden Dresden]	Anzuchthaus Orchideenhaus [propagator orchid house]	51.0435	13.7582	100	WGS 84	auf der Unterseite von Blumentöpfen, die auf Holzunterlagen standen [under flower pots standing on wood base]	1964-11-17					RICHTER (1967)
Poratia digitata (Porat, 1889)	Northrhine-Westphalia	Düsseldorf	Aquazoo-Löbbecke Museum	tropical hothouse	51.2564	6.7497	100	WGS 84							ADIS et al. (2000)
Poratia digitata (Porat, 1889)	Hamburg	Hamburg	Loki-Schmidt-Garten [Loki-Schmidt Botanical Garden Hamburg]	tropical hothouses	53.5603	9.9858	100	WGS 84	under wood and dead leaves	2007-11-10	H. Reip	7	SMNG
Poratia digitata (Porat, 1889)	Hamburg	Hamburg	Hamburg-Bergedorf, Lohgerberei [tannery]	greenhouses	53.487	10.215	4000	WGS 84				3♀♀			LATZEL (1895)
Poratia digitata (Porat, 1889)	Baden-Württemberg	Karlsruhe	Botanischer Garten Karlsruhe [Botanical Garden Karlsruhe]	greenhouses, easten big hothouse	49.0136	8.4011	100	WGS 84	under flower pots and dead wood	2010-04-13	H. Reip	3♀♀, 4 juv.	SMNG
Poratia digitata (Porat, 1889)	Schleswig-Holstein	Kiel	Botanischer Garten der Christian-Albrechts-Universität zu Kiel [Botanical Garden Kiel]	Viktoria-Haus [Victoria house]	54.347	10.1158	100	WGS 84		07.11.1998–11.09.1999	Wilck, Adis & Golovatch	2♀♀		temperature 18-24°C, humidity 68-90%	WILCK (2000), ADIS et al. (2000)
Poratia digitata (Porat, 1889)	Saxony	Leipzig	Botanischer Garten Leipzig [Botanical Garden Leipzig]	Gewächshäuser [Tropical hothouses]	51.3283	12.3912	100	WGS 84		1995-12-31	E. N. Lindner	4♀♀, 4 juv.	SMNG
Poratia digitata (Porat, 1889)	Saxony	Leipzig	Botanischer Garten Leipzig [Botanical Garden Leipzig]	Gewächshäuser, Haus 2 [Tropical hothouses, House 2]	51.3283	12.3912	100	WGS 84	under stone	1995-12-08	E. N. Lindner	4♀♀	SMNG
Poratia digitata (Porat, 1889)	Saxony	Leipzig	Zoologischer Garten Leipzig, Gondwanaland [Zoological Garden Leipzig, Gondwanaland]	Tropical Hothouse	51.3505	12.3716	100	WGS 84	at dead wood	2013-03-26	E. N. Lindner	2♀♀, 2 juv.	SMNG
Poratia digitata (Porat, 1889)	Saxony	Leipzig	Zoologischer Garten Leipzig, Gondwanaland [Zoological Garden Leipzig, Gondwanaland]	Tropical Hothouse	51.3505	12.3716	100	WGS 84	at dead wood	2013-04-05	E. N. Lindner	2♀♀	SMNG
Poratia digitata (Porat, 1889)	Lower Saxony	Oldenburg	Botanischer Garten Oldenburg [Botanical Garden Oldenburg]	Tropical hothouse	53.1486	8.1942	100	WGS 84	under dead wood	2013-11-29	H. Reip	16♀, 11 juv.	SMNG
Poratia digitata (Porat, 1889)	Brandenburg	Potsdam	Botanischer Garten Potsdam [Botanical Garden Potsdam]	Bromelarium [bromeliad house]	52.404	13.025	100	WGS 84	under wood and dead leaves	2009-11-07	H. Reip	15 juv.	SMNG	temperature 14-23°C
Poratia digitata (Porat, 1889)	Brandenburg	Potsdam	Botanischer Garten Potsdam [Botanical Garden Potsdam]	Victoriahaus (Haus 7) [Victoria house (house 7)]	52.404	13.025	100	WGS 84	under wood and dead leaves	2009-11-07	H. Reip	3♀♀, 35 juv.	SMNG	temperature 20-28°C
Poratia obliterata (Kraus, 1960)	Schleswig-Holstein	Kiel	Botanischer Garten der Christian-Albrechts-Universität zu Kiel [Botanical Garden Kiel]	Viktoria-Haus [Victoria house]	54.347	10.1158	100	WGS 84		07.11.1998–11.09.1999	Wilck, Adis & Golovatch	20♀♀		temperature 18-24°C, humidity 68-90%	WILCK (2000), ADIS et al. (2000)
Prosopodesmus jacobsoni Silvestri, 1910	Northrhine-Westphalia	Bonn	Botanischer Garten der Friedrichs-Wilhelms-Universität Bonn [Botanical Garden Bonn]	Palmhaus [palm house]	50.7243	7.0913	100	WGS 84	under dead leaves	2007-08-14	P. Decker & N. Laufer	5♀♀, 3 juv.	SMNG		DECKER & HANNIG (2011)
Prosopodesmus jacobsoni Silvestri, 1910	Hesse	Frankfurt am Main	Palmengarten [Palm Garden]	Mangrove	50.1233	8.6559	100	WGS 84		16.03.2008-28.03.2008, 10.10.2008-24.10.2008	E. Heußler	1♀	SMNG	pitfall traps, temperature 20-23 °C, humidity ca. 90%	DECKER & HANNIG (2011)
Prosopodesmus jacobsoni Silvestri, 1910	Hesse	Frankfurt am Main	Palmengarten [Palm Garden]	Monsun	50.1233	8.6559	100	WGS 84		26.09.2008-24.10.2008	E. Heußler	1♂, 2 ind.	SMNG	pitfall traps, temperature 19-25 °C, humidity ca. 70-80%	DECKER & HANNIG (2011)
Prosopodesmus jacobsoni Silvestri, 1910	Hesse	Frankfurt am Main	Palmengarten [Palm Garden]	Monsun	50.1233	8.6559	100	WGS 84		2011-11-28	H. Reip	1♀	SMNG		DECKER & HANNIG (2011)
Prosopodesmus jacobsoni Silvestri, 1910	Hesse	Frankfurt am Main	Palmengarten [Palm Garden]	Regenwald [rain forest]	50.1233	8.6559	100	WGS 84		14.03.2008-2008, 11.04.2008-25.04.2008, 09.05.2008-23.05.2008, 06.06.2008-20.06.2008, 11.09.2008-25.09.2008	E. Heußler	1♂, 1♀, juv., 42 ind.	SMNG	pitfall traps, temperature 20-22 °C, humidity ca. 70-80%	DECKER & HANNIG (2011)
Prosopodesmus jacobsoni Silvestri, 1910	Hesse	Frankfurt am Main	Palmengarten [Palm Garden]	Regenwald [rain forest]	50.1233	8.6559	100	WGS 84		2011-11-28	H. Reip	1♀	SMNG		DECKER & HANNIG (2011)
Prosopodesmus jacobsoni Silvestri, 1910	Hesse	Frankfurt am Main	Palmengarten [Palm Garden]	Savanne [savanna]	50.1233	8.6559	100	WGS 84		06.09.2008-10.10.2008	E. Heußler	1 juv.	SMNG	pitfall traps, temperature 17-26 °C, humidity ca.70 %	DECKER & HANNIG (2011)
Prosopodesmus jacobsoni Silvestri, 1910	Northrhine-Westphalia	Köln [Cologne]	Flora [Botanical Garden Cologne]		50.9607	6.9692	100	WGS 84	under dead leaves	2007-08-14	P. Decker & N. Laufer	2♂♂	SMNG		DECKER & HANNIG (2011)
Prosopodesmus jacobsoni Silvestri, 1910	Northrhine-Westphalia	Köln [Cologne]	Flora [Botanical Garden Cologne]		50.9607	6.9692	100	WGS 84	under dead wood and stones	2010-06-30	H. Reip	8♂♂, 2♀♀, 1 juv.	SMNG		DECKER & HANNIG (2011)
Proteroiulus fuscus (Am Stein, 1857)	Berlin	Berlin	Botanischer Garten Dahlem der Freien Universität Berlin [Botanical Garden Berlin-Dahlem]	tropical hothouses	52.4548	13.3085	100	WGS 84			Boettger				BOETTGER (1929)
Proteroiulus fuscus (Am Stein, 1857)	Brandenburg	Potsdam	Botanischer Garten Potsdam [Botanical Garden Potsdam]	Palmenhaus (Haus 1) [palm house (house 1)]	52.404	13.025	100	WGS 84	in bark mulch	2009-11-07	H. Reip	3♀♀	SMNG	temperature 15-22°C
Rhinotus purpureus (Pocock, 1894)	Hesse	Frankfurt am Main	Palmengarten [Palm Garden]	Bromelarium [bromeliad house]	50.1233	8.6559	100	WGS 84		14.03.2008-28.03.2008, 11.04.2008-25.04.2008, 23.05.2008-06.06.2008	E. Heußler	14	SMNG	pitfall traps, temperature 20-23 °C, humidity ca. 60%
Rhinotus purpureus (Pocock, 1894)	Hesse	Frankfurt am Main	Palmengarten [Palm Garden]	Mangrove	50.1233	8.6559	100	WGS 84		06.06.2008-20.08.2008	E. Heußler	1	SMNG	pitfall traps, temperature 20-23 °C, humidity ca. 90%
Rhinotus purpureus (Pocock, 1894)	Hesse	Frankfurt am Main	Palmengarten [Palm Garden]	Monsun	50.1233	8.6559	100	WGS 84		11.04.2008-25.04.2008	E. Heußler	1	SMNG	pitfall traps, temperature 19-25 °C, humidity ca. 70-80%
Rhinotus purpureus (Pocock, 1894)	Hesse	Frankfurt am Main	Palmengarten [Palm Garden]	Regenwald [rain forest]	50.1233	8.6559	100	WGS 84		14.03.2008-09.05.2008, 06.06.2008-20.08.2008, 17.07.2008-31.07.2008	E. Heußler	19	SMNG	pitfall traps, temperature 20-22 °C, humidity ca. 70-80%
Rhinotus purpureus (Pocock, 1894)	Hesse	Frankfurt am Main	Palmengarten [Palm Garden]	Regenwald [rain forest]	50.1233	8.6559	100	WGS 84		2011-11-28	H. Reip	1♀	SMNG
Strongylosoma stigmatosum (Eichwald, 1830)	Berlin	Berlin	Botanischer Garten Dahlem der Freien Universität Berlin [Botanical Garden Berlin-Dahlem]	tropical hothouses	52.4548	13.3085	100	WGS 84							EICHLER (1952)
Unciger foetidus (C. L. Koch, 1838)	Berlin	Berlin	Botanischer Garten Dahlem der Freien Universität Berlin [Botanical Garden Berlin-Dahlem]	tropical hothouses	52.4548	13.3085	100	WGS 84							EICHLER (1952)

## Sheet: Chilopoda
Species	Federal State	City	Location	Site	Latitude (decimal)	Longitude (decimal)	Coordinate uncertainty in meters	Geodetic datum	Micro-habitat	Sampling date	Collector	Sampled specimens	Collection	Notes	Literature
Cryptops doriae Pocock, 1891	Brandenburg	Potsdam	Biosphäre Potsdam (im BUGA-Park) [Biosphere Potsdam]	Tropenhaus [tropical hothouse]	52.4185	13.0486	100	WGS 84	in mulch	2013-09-19	E. N. Lindner	2Ex	SMNG
Cryptops doriae Pocock, 1891	Saxony	Leipzig	Zoologischer Garten Leipzig, Gondwanaland [Zoological Garden Leipzig, Gondwanaland]	Tropical Hothouse	51.3505	12.3716	100	WGS 84	under stone	2013-04-05	E. N. Lindner	1Ex	SMNG
Cryptops hortensis (Donovan, 1810)	Saxony-Anhalt	Magdeburg	Gruson-Gewächshäuser [Gruson greenhouses]	Bromelienhaus [bromeliad house	52.1139	11.6315	100	WGS 84	under pieces of bark on bark mulch	2012-06-13	H. Reip	1	SMNG
Cryptops hortensis (Donovan, 1810)	Saxony-Anhalt	Magdeburg	Gruson-Gewächshäuser [Gruson greenhouses]	Orchideenhaus [orchid house]	52.1139	11.6315	100	WGS 84	under bag of peat on mix of peat and bark mulch	2012-06-13	H. Reip	1juv.	SMNG
Cryptops hortensis (Donovan, 1810)	Berlin	Berlin	Botanischer Garten Dahlem der Freien Universität Berlin [Botanical Garden Berlin-Dahlem]	Warmhaus [hothouse]	52.4548	13.3085	100	WGS 84							EICHLER (1952
Cryptops hortensis (Donovan, 1810)	Baden-Württemberg	Konstanz	Mainau	Schmetterlingshaus [butterfly house]	47.7068	9.1951	100	WGS 84		2012-04-21	N. Lindner	2
Geophilus electricus (Linnaeus, 1758)	Berlin	Berlin	Botanischer Garten Dahlem der Freien Universität Berlin [Botanical Garden Berlin-Dahlem]	Warmhaus [hothouse]	52.4548	13.3085	100	WGS 84							EICHLER (1952)
Geophilus flavus (De Geer, 1778)	Berlin	Berlin	Botanischer Garten Dahlem der Freien Universität Berlin [Botanical Garden Berlin-Dahlem]	Warmhaus [hothouse]	52.4548	13.3085	100	WGS 84							EICHLER (1952)
Geophilus flavus (De Geer, 1778)	Saxony	Leipzig	Botanischer Garten Leipzig [Botanical Garden Leipzig]	Gewächshäuser, Haus 2 [Tropical hothouses, House 2]	51.3283	12.3912	100	WGS 84		1995-12-12	E. N. Lindner	2Ex	SMNG
Geophilus flavus (De Geer, 1778)	Hamburg	Hamburg	Loki-Schmidt-Garten [Loki-Schmidt Botanical Garden Hamburg]	hothouse	53.5603	9.9858	100	WGS 84		1949-06-15		1♀			JEEKEL (1964)
Henia vesuviana (Newport, 1845)	Saxony	Dresden	Botanischer Garten Dresden [Botanical Garden Dresden]	Warmhaus [hothouse]	51.0435	13.7582	100	WGS 84	under stone	2013-03-10	E. N. Lindner	2Ex	SMNG
Henia vesuviana (Newport, 1845)	Saxony	Leipzig	Botanischer Garten Leipzig [Botanical Garden Leipzig]	Gewächshäuser, Haus 1 [Tropical hothouses, House 1]	51.3283	12.3912	100	WGS 84	in old potato	1995-12-15	E. N. Lindner	1Ex	SMNG
Lamyctes coeculus (Brölemann, 1889)	Berlin	Berlin	Botanischer Garten Dahlem der Freien Universität Berlin [Botanical Garden Berlin-Dahlem]	Gewächshaus A (Großes Tropenhaus / Tropischer Regenwald) [Great tropical hothouse / Tropical Rainforest]	52.4548	13.3085	100	WGS 84	in humus	2013-05-15	E. N. Lindner	2Ex	SMNG
Lamyctes coeculus (Brölemann, 1889)	Berlin	Berlin	Botanischer Garten Dahlem der Freien Universität Berlin [Botanical Garden Berlin-Dahlem]	Gewächshaus A (Großes Tropenhaus / Tropischer Regenwald) [Great tropical hothouse / Tropical Rainforest]	52.4548	13.3085	100	WGS 84	in mulch	2013-05-15	E. N. Lindner	3Ex	SMNG
Lamyctes coeculus (Brölemann, 1889)	Berlin	Berlin	Botanischer Garten Dahlem der Freien Universität Berlin [Botanical Garden Berlin-Dahlem]	Gewächshaus I (Kakteen und andere sukkulente Pflanzen Amerikas) [Cactuses of America]	52.4548	13.3085	100	WGS 84	under stones	2013-05-15	E. N. Lindner	1Ex	SMNG
Lamyctes coeculus (Brölemann, 1889)	Saxony	Leipzig	Botanischer Garten Leipzig [Botanical Garden Leipzig]	Gewächshäuser, Haus 2 [Tropical hothouses, House 2]	51.3283	12.3912	100	WGS 84	in upper soil	2013-04-03	E. N. Lindner	4Ex	SMNG
Lithobius aeruginosus L. Koch, 1862	Northrhine-Westphalia	Kamen	Hothouse		51.59	7.66	5800	WGS 84	unter Töpfen [under flower pots]	1905-04-15		1♂			VERHOEFF (1934)
Lithobius crassipes L. Koch, 1862	Berlin	Berlin	alter Botanischer Garten Berlin [Old Botanical Garden Berlin]		52.4565	13.3074	100	WGS 84							EICHLER (1952)
Lithobius crassipes L. Koch, 1862	Rhineland-Palatinate	Mainz	Botanischer Garten der Johannes Gutenberg Universität Mainz [Botanical Garden Mainz]	tropical hothouses	49.9925	8.2454	100	WGS 84		2006-11-04	P. Decker	1♀	SMNG
Lithobius crassipes L. Koch, 1862	Hesse	Darmstadt	Botanischer Garten der technischen Hochschule [Botanical Garden Darmstadt]	tropical hothouses	49.9925	8.2454	100	WGS 84		2007-01-20	P. Decker & N. Laufer	1♀	SMNG
Lithobius forficatus (Linnaeus, 1758)	Bavaria	Bayreuth	Ökologisch-Botanischer Garten Universität Bayreuth [Ecological Botanical Garden Bayreuth]	Venlo Block groß	49.9257	11.5841	100	WGS 84	on way between plant container	01.2012-02.2012	J. Neubauer	1♀	SMNG
Lithobius forficatus (Linnaeus, 1758)	Hamburg	Hamburg	greenhouses		53.55	9.99	10000	WGS 84							LATZEL (1895)
Lithobius forficatus (Linnaeus, 1758)	Saxony-Anhalt	Magdeburg	Gruson-Gewächshäuser [Gruson greenhouses]	Bromelienhaus [bromeliad house	52.1139	11.6315	100	WGS 84	under pieces of bark	2012-06-13	H. Reip	1juv.	SMNG
Lithobius forficatus (Linnaeus, 1758)	Berlin	Berlin	Botanischer Garten Dahlem der Freien Universität Berlin [Botanical Garden Berlin-Dahlem]	tropical hothouses	52.4548	13.3085	100	WGS 84			Boettger				BOETTGER (1929), EICHLER (1952)
Lithobius forficatus (Linnaeus, 1758)	Bavaria	Bayreuth	Ökologisch-Botanischer Garten Universität Bayreuth [Ecological Botanical Garden Bayreuth]	Haus AH11	49.9257	11.5841	100	WGS 84		2012-01-26	K. Lebermann	1♂	SMNG
Lithobius forficatus (Linnaeus, 1758)	Bavaria	Bayreuth	Ökologisch-Botanischer Garten Universität Bayreuth [Ecological Botanical Garden Bayreuth]	Haus AH11	49.9257	11.5841	100	WGS 84		2012-02-07	J. Neubauer	1♀	SMNG
Lithobius forficatus (Linnaeus, 1758)	Saxony-Anhalt	Magdeburg	Gruson-Gewächshäuser [Gruson greenhouses]	Orchideenhaus [orchid house]	52.1139	11.6315	100	WGS 84	under bag of peat on mix of peat and bark mulch	2012-06-13	H. Reip	1♂, 1♀	SMNG
Lithobius forficatus (Linnaeus, 1758)	Saxony-Anhalt	Magdeburg	Gruson-Gewächshäuser [Gruson greenhouses]	Palmenhaus [palm house]	52.1139	11.6315	100	WGS 84	under palm bark on the ground	2012-06-13	H. Reip	2♀♀, 1juv.	SMNG
Lithobius forficatus (Linnaeus, 1758)	Hesse	Darmstadt	Botanischer Garten der technischen Hochschule [Botanical Garden Darmstadt]	tropical hothouses	49.9925	8.2454	100	WGS 84		2007-01-20	P. Decker & N. Laufer	2juv.	SMNG
Lithobius forficatus (Linnaeus, 1758)	Saxony	Dresden	Botanischer Garten Dresden [Botanical Garden Dresden]	Warmhaus [hothouse]	51.0435	13.7582	100	WGS 84	under leaves	2013-03-10	E. N. Lindner	1Ex	SMNG
Lithobius forficatus (Linnaeus, 1758)	Saxony	Leipzig	Leipzig-Heiterblick, Baumschule/Gartenbau Felgenträger [nursery garden and horticulture Felgenträger]	greenhouse	51.34	12.37	10000	WGS 84		2008-11-09	N. Lindner			in winter no freezing but not heated
Lithobius forficatus (Linnaeus, 1758)	Berlin	Berlin	Gewächshäuser der Gartenbaugroßbetriebe Bermann Rothe in Berlin-Zehlendorf [greenhouses of horticulture company Bermann Rothe in Berlin-Zehlendorf]		52.432	13.258	3000	WGS 84			Boettger	zahlreich vertreten [numerous]			BOETTGER (1929)
Lithobius lapidicola Meinert, 1872	Berlin	Berlin	alter Botanischer Garten Berlin [Old Botanical Garden Berlin]		52.4565	13.3074	100	WGS 84							EICHLER (1952)
Lithobius melanops Newport, 1845	Berlin	Berlin	Botanischer Garten Dahlem der Freien Universität Berlin [Botanical Garden Berlin-Dahlem]	Warmhaus [hothouse]	52.4548	13.3085	100	WGS 84							EICHLER (1952)
Lithobius melanops Newport, 1845	Berlin	Berlin	Zoologischer Garten Berlin [Berlin Zoological Garden]	Vogelhaus [aviary], Freiflughalle Australien [free flight hall Australia]	52.5102	13.3366	100	WGS 84	under stones	2013-09-28	P. Decker & M. Köhler	1♂, 1♀, 1 juv.	SMNG	individual already dead
Lithobius melanops Newport, 1845	Northrhine-Westphalia	Kamen	Hothouse		51.59	7.66	5800	WGS 84	unter Töpfen [under flower pots]	1905-04-15		1♀			VERHOEFF (1934)
Lithobius melanops Newport, 1845	Saxony	Leipzig	Leipzig-Heiterblick, Baumschule/Gartenbau Felgenträger [nursery garden and horticulture Felgenträger]	greenhouse	51.34	12.37	10000	WGS 84		2008-11-09	N. Lindner			in winter no freezing but not heated
Lithobius melanops Newport, 1845	Saxony	Leipzig	Botanischer Garten Leipzig [Botanical Garden Leipzig]	Gewächshäuser, Haus 2 [Tropical hothouses, House 2]	51.3283	12.3912	100	WGS 84	in mulch	1995-12-07	E. N. Lindner	1Ex	SMNG
Lithobius microps Meinert, 1868	Berlin	Berlin	Botanischer Garten Dahlem der Freien Universität Berlin [Botanical Garden Berlin-Dahlem]	Gewächshaus L (Tierfangende Pflanzen und Pflanzen der Südhemisphäre) [Tropical hothouse Carnivorous plants]	52.4548	13.3085	100	WGS 84	under stone	2013-05-15	E. N. Lindner	1Ex	SMNG
Lithobius microps Meinert, 1868	Berlin	Berlin	Botanischer Garten Dahlem der Freien Universität Berlin [Botanical Garden Berlin-Dahlem]	Gewächshaus K (Südafrika) [Tropical hothouse Southafrica]	52.4548	13.3085	100	WGS 84	under stones on sandy ground	2013-05-15	E. N. Lindner	1Ex	SMNG
Lithobius microps Meinert, 1868	Berlin	Berlin	Botanischer Garten Dahlem der Freien Universität Berlin [Botanical Garden Berlin-Dahlem]	Warmhaus [hothouse]	52.4548	13.3085	100	WGS 84							EICHLER (1952)
Lithobius microps Meinert, 1868	Berlin	Berlin	Gewächshäuser der Gartenbaugroßbetriebe Bermann Rothe in Berlin-Zehlendorf [greenhouses of horticulture company Bermann Rothe in Berlin-Zehlendorf]		52.432	13.258	3000	WGS 84			Boettger	1♂			BOETTGER (1929)
Lithobius mutabilis L.Koch, 1862	Saxony-Anhalt	Magdeburg	Gruson-Gewächshäuser [Gruson greenhouses]	Bromelienhaus [bromeliad house	52.1139	11.6315	100	WGS 84	under pieces of bark on bark mulch	2012-06-13	H. Reip	1juv.	SMNG
Lithobius mutabilis L.Koch, 1862	Saxony-Anhalt	Magdeburg	Gruson-Gewächshäuser [Gruson greenhouses]	Großes Tropenhaus [big tropical house]	52.1139	11.6315	100	WGS 84	under pieces of wood on ground, under bark	2012-06-13	H. Reip	1♀, 1juv. ♂	SMNG
Mecistocephalus maxillaris (Gervais, 1837)	Rhineland-Palatinate	Trier	greenhouse		49.753	6.64	5000	WGS 84				selten [rare]			SCHNUR (1857)
Mecistocephalus maxillaris (Gervais, 1837)	Berlin	Berlin	alter Botanischer Garten Berlin [Old Botanical Garden Berlin]		52.4565	13.3074	100	WGS 84							EICHLER (1952)
Mecistocephalus maxillaris (Gervais, 1837)	Hamburg	Hamburg	hothouses of the nursery Richers		53.55	9.99	10000	WGS 84				3			LATZEL (1895), JEEKEL (1964)
Pachymerium ferrugineum (C.L.Koch, 1835)	Saxony-Anhalt	Magdeburg	Gruson-Gewächshäuser [Gruson greenhouses]	Bromelienhaus [bromeliad house	52.1139	11.6315	100	WGS 84	under pieces of bark on bark mulch	2012-06-13	H. Reip	1♀, 1juv.	SMNG
Pachymerium ferrugineum (C.L.Koch, 1835)	Saxony-Anhalt	Magdeburg	Gruson-Gewächshäuser [Gruson greenhouses]	Palmenhaus [palm house]	52.1139	11.6315	100	WGS 84	under palm bark on the ground	2012-06-13	H. Reip	1juv.	SMNG
Pachymerium ferrugineum (C.L.Koch, 1835)	Saxony-Anhalt	Magdeburg	Gruson-Gewächshäuser [Gruson greenhouses]	Großes Tropenhaus [big tropical house]	52.1139	11.6315	100	WGS 84	under pieces of wood on ground, under bark	2012-06-13	H. Reip	1juv.	SMNG
Pectiniunguis pauperatus Silvestri, 1907	Hamburg	Hamburg	Loki-Schmidt-Garten [Loki-Schmidt Botanical Garden Hamburg]		53.5603	9.9858	100	WGS 84				1♀		from the West Indies, type	SILVESTRI (1907)
Stigmatogaster subterranea (Shaw, 1789)	Hamburg	Hamburg	Loki-Schmidt-Garten [Loki-Schmidt Botanical Garden Hamburg]	hothouse	53.5603	9.9858	100	WGS 84		1950-12-30		1♀			JEEKEL (1964)
Tygarrup javanicus (Attems, 1907)	Brandenburg	Potsdam	Biosphäre Potsdam (im BUGA-Park) [Biosphere Potsdam]	Tropenhaus [tropical hothouse]	52.4185	13.0486	100	WGS 84	at dead wood	2013-09-19	E. N. Lindner	1Ex	SMNG
Tygarrup javanicus (Attems, 1907)	Berlin	Berlin	Botanischer Garten Dahlem der Freien Universität Berlin [Botanical Garden Berlin-Dahlem]	Gewächshaus A (Großes Tropenhaus / Tropischer Regenwald) [Great tropical hothouse / Tropical Rainforest]	52.4548	13.3085	100	WGS 84	in mulch	2013-05-15	E. N. Lindner	4Ex	SMNG
Tygarrup javanicus (Attems, 1907)	Berlin	Berlin	Botanischer Garten Dahlem der Freien Universität Berlin [Botanical Garden Berlin-Dahlem]	Gewächshaus D (Orchideen und Kannenpflanzen) [Tropical hothouse Orchids and Nepenthes]	52.4548	13.3085	100	WGS 84	under stones	2013-05-15	E. N. Lindner	1Ex	SMNG
Tygarrup javanicus (Attems, 1907)	Berlin	Berlin	Botanischer Garten Dahlem der Freien Universität Berlin [Botanical Garden Berlin-Dahlem]	Gewächshaus A (Großes Tropenhaus / Tropischer Regenwald) [Great tropical hothouse / Tropical Rainforest]	52.4548	13.3085	100	WGS 84	in humus	2013-05-15	E. N. Lindner	1Ex	SMNG
Tygarrup javanicus (Attems, 1907)	Saxony	Dresden	Botanischer Garten Dresden [Botanical Garden Dresden]	Warmhaus [hothouse]	51.0435	13.7582	100	WGS 84	under leaves	2013-03-10	E. N. Lindner	2Ex	SMNG
Tygarrup javanicus (Attems, 1907)	Saxony	Leipzig	Botanischer Garten Leipzig [Botanical Garden Leipzig]	Gewächshäuser, Haus 1 [Tropical hothouses, House 1]	51.3283	12.3912	100	WGS 84	at dead wood	1995-12-07	E. N. Lindner	2Ex	SMNG
Tygarrup javanicus (Attems, 1907)	Saxony	Leipzig	Zoologischer Garten Leipzig, Gondwanaland [Zoological Garden Leipzig, Gondwanaland]	Tropical Hothouse	51.3505	12.3716	100	WGS 84	at trunc of palm tree	2013-03-26	E. N. Lindner	1Ex	SMNG
