# Supplementary material for: Millipedes and centipedes in German greenhouses (Myriapoda: Diplopoda, Chilopoda)
Source: Biodivers Data J. 2014 Apr 11;(2):e1066. doi: 10.3897/BDJ.2.e1066 (PMC4031429; doi:10.3897/BDJ.2.e1066)
Supplement: Supplementary material 2 — Distribution of German greenhouse myriapods across cities [file biodiversity_data_journal-2-e1066-s002.xls]

## Sheet: city_species
Table 2 Species spectrum in German greenhouses. Bold – introduced species.
	Bayreuth	Berlin	Bochum	Bonn	Darmstadt	Dresden	Duisburg	Düsseldorf	Frankfurt a. M.	Halle	Hamburg	Jena	Kamen	Karlsruhe	Kiel	Köln	Konstanz	Leipzig	Magdeburg	Mainz	Marburg	Marlow	München	Potsdam	Rostock	Trier	Records		European introduced species	Non-European introduced species	Restricted to greenhouses
CHILOPODA
Cryptops doriae Pocock, 1891																		X						X			2			X	X
Cryptops hortensis (Donovan, 1810)		X							X								X	X	X								5
Geophilus electricus (Linnaeus, 1758)		X																									1
Geophilus flavus (De Geer, 1778)		X									X							X									3
Henia vesuviana (Newport, 1845)						X												X									2		X
Lamyctes coeculus (Brölemann, 1889)		X																X									2			X	X
Lithobius aeruginosus L. Koch, 1862													X														1
Lithobius crassipes L. Koch, 1862		X			X															X							3
Lithobius forficatus (Linnaeus, 1758)	X	X			X	X					X							X	X								7
Lithobius lapidicola Meinert, 1872		X																									1
Lithobius melanops Newport, 1845		X											X					X									3
Lithobius microps Meinert, 1868		X																									1
Lithobius mutabilis L. Koch, 1862																			X								1
Mecistocephalus maxillaris (Gervais, 1837)		X									X															X	3			X
Pachymerium ferrugineum (C.L.Koch, 1835)																			X								1
Pectiniunguis pauperatus Silvestri, 1907											X																1			X
Stigmatogaster subterranea (Shaw, 1789)											X																1		X
Tygarrup javanicus (Attems, 1907)		X				X												X						X			4			X	X
DIPLOPODA
Amphitomeus attemsi (Schubart, 1934)		X	X	X					X	X	X	X		X	X	X		X	X	X			X	X			15			X	X
Anadenobolus monilicornis (Porat, 1876)																		X									1			X	X
Archiboreoiulus pallidus (Brade-Birks, 1920)																X											1
Blaniulus guttulatus (Bosc, 1792)		X				X			X			X				X								X	X		7
Boreoiulus tenuis (Bigler, 1913)												X															1		X
Brachydesmus superus Latzel, 1884		X																									1
Brachyiulus pusillus (Bosc, 1792)									X																		1
Choneiulus palmatus (Němec, 1895)		X	X			X			X		X	X		X		X		X	X	X				X	X		13		X
Cylindrodesmus hirsutus Pocock, 1889		X							X		X					X		X		X				X			7			X	X
Cylindroiulus britannicus (Verhoeff, 1891)		X		X		X					X		X					X						X			7		X
Cylindroiulus caeruleocinctus (Wood, 1864)		X							X																		2
Cylindroiulus latestriatus (Curtis, 1845)		X							X						X									X			4
Cylindroiulus punctatus (Leach, 1815)		X																									1
Cylindroiulus truncorum (Silvestri, 1896)		X				X			X		X	X	X	X	X	X		X	X	X			X	X			14			X
Cylindroiulus vulnerarius (Berlese, 1888)																								X			1		X
Epinannolene cf. trinidadensis Chamberlin, 1918																		X									1			X	X
Epinannolene sp.									X																		1			X	X
Kryphioiulus occultus (C. L. Koch, 1847)		X																									1
Leptogoniulus sorornus (Butler, 1876)		X																X									2			X	X
Melogona voigtii (Verhoeff, 1899)		X																									1
Mesoiulus gridellii Strasser, 1934									X																		1		X		X
Nopoiulus kochii (Gervais, 1847)		X							X				X		X									X			5
Ommatoiulus sabulosus (Linnaeus, 1758)		X																									1
Oxidus gracilis (C. L. Koch, 1847)	X	X	X	X		X	X		X	X	X	X		X	X	X	X	X	X	X	X	X		X			20			X
Paraspirobolus lucifugus (Gervais, 1836)		X		X					X		X																4			X	X
Polydesmus angustus Latzel, 1884						X																					1
Polydesmus complanatus (Linnaeus, 1761)		X									X																1
Polydesmus inconstans Latzel, 1884		X																									1
Poratia digitata (Porat, 1889)		X				X		X			X			X	X			X						X			8			X	X
Poratia obliterata (Kraus, 1960)															X												1			X	X
Prosopodesmus jacobsoni Silvestri, 1910				X					X							X											3			X	X
Proteroiulus fuscus (Am Stein, 1857)		X																						X			2
Rhinotus purpureus (Pocock, 1894)									X																		1			X	X
Strongylosoma stigmatosum (Eichwald, 1830)		X																									1
Unciger foetidus (C. L. Koch, 1838)		X																									1
Records Total	2	34	3	5	2	10	1	1	16	2	14	6	5	5	7	8	2	18	8	6	1	1	2	14	2	1			7	18	15
